# Supplementary material for: The Benefits of State and Local Government Employees
Source: Royal Society of Chemistry journal article supplement (doi:10.1039/d3sc05245a), 2010-01-01
Supplement: d3sc05245a1.pdf [file d3sc05245a1.pdf]

## Supporting Information

### **0D Hybrid Lead-free Halide with Near-unity Photoluminescence Quantum Yield toward Multifunctional Optoelectronic Applications**

Dong-Yang Li,<sup>†</sup> Huai-Yuan Kang,<sup>†</sup> Yu-Hang, Liu, Jie Zhang, Cheng-Yang Yue, Dongpeng Yan,\*  
and Xiao-Wu Lei\*

Dong-Yang Li, Prof. Cheng-Yang Yue, Prof. Xiao-Wu Lei  
School of Chemistry, Chemical Engineer and Materials, Jining University, Qufu, Shandong,  
273155, P. R. China  
E-mail: xwlei\_jnu@163.com

Prof. Dongpeng Yan  
Beijing Key Laboratory of Energy Conversion and Storage Materials, College of Chemistry, and  
Key Laboratory of Radiopharmaceuticals, Ministry of Education, Beijing Normal University,  
Beijing 100875, P. R. China  
E-mail: yandp@bnu.edu.cn

Dong-Yang Li, Yu-Hang Liu, Jie Zhang  
School of Chemistry and Chemical Engineering, Qufu Normal University, Qufu, Shandong, 273165,  
P. R. China

<sup>†</sup> Dong-Yang Li and Huai-Yuan Kang contributed equally to this work.

---

## Experimental Section

**Materials:** The chemical materials were commercially purchased from Aladdin chemical company and directly used without any further purification.  $\text{InCl}_3 \cdot 4\text{H}_2\text{O}$  (99.99%),  $\text{SbCl}_3$  (99.99%), 3,3'-iminobis (N,N-dimethylpropylamine) (Im-BDMPA,  $\text{C}_{10}\text{H}_{25}\text{N}_3$ , 97%), hydrochloric acid (HCl, 37%), ethanol (EtOH, 99%), isobutanol (99%), acetonitrile (99%), acetone (99%), Epoxy resin adhesive, Sylgard 184 elastomer kit, Dow corning and polytetrafluoroethylene mode.

**Synthesis of (Im-BDMPA) $\text{InCl}_6 \cdot \text{H}_2\text{O}$  and (Im-BDMPA) $\text{In}_{0.78}\text{Sb}_{0.22}\text{Cl}_6 \cdot \text{H}_2\text{O}$  crystals:** 0.2932 g  $\text{InCl}_3 \cdot 4\text{H}_2\text{O}$  and 0.1873 g Im-BDMPA were added to the mixed solution of HCl (1 mL), isobutanol (3 mL) and acetonitrile (2 mL) with continuously heating and stirring to dissolve. Then the solution was transferred into a 15 mL glass vial and heated at 80 °C for 5 days. After cooling down to 25 °C, the colorless plate-like crystals were collected by filtration and determined as (Im-BDMPA) $\text{InCl}_6 \cdot \text{H}_2\text{O}$  ( $\text{C}_{10}\text{H}_{27}\text{N}_3\text{OInCl}_6$ ) by single-crystal XRD. The crystals were washed with methanol three times and stored in a sealed bottle (yield of 90% based on  $\text{InCl}_3$ ). The simulated elemental contents of  $\text{C}_{10}\text{H}_{27}\text{N}_3\text{OInCl}_6$  were calculated to be 22.53% and 7.88% for C and N elements, respectively, which match with the experimental results (C = 22.55%; N = 7.90%). The colorless crystals of (Im-BDMPA) $\text{In}_{0.78}\text{Sb}_{0.22}\text{Cl}_6 \cdot \text{H}_2\text{O}$  were prepared via the same reaction condition with the addition of  $\text{SbCl}_3$  (0.1145 g).

**Synthesis of (Im-BDMPA) $\text{Cl}_3$ :** Briefly, Im-BDMPA was firstly added into HCl to form clear solution and then condensed via rotary evaporation to form white powder. The obtained powder was washed with ethanol for several times and finally collected after drying in vacuum oven.

**Solid phase synthesis of (Im-BDMPA) $\text{In}_{0.78}\text{Sb}_{0.22}\text{Cl}_6 \cdot \text{H}_2\text{O}$ :** Mixture of  $\text{SbCl}_3$  (0.1145 g),  $\text{InCl}_3 \cdot 4\text{H}_2\text{O}$  (0.2932 g) and (Im-BDMPA) $\text{Cl}_3$  (0.187 g) was ground together using a mortar and

---

pestle for about 15 minutes. A white microscale powder of  $(\text{Im-BDMPA})\text{In}_{0.78}\text{Sb}_{0.22}\text{Cl}_6\cdot\text{H}_2\text{O}$  was obtained and used for further studies.

**Synthesis of  $(\text{Im-BDMPA})\text{In}_{0.78}\text{Sb}_{0.22}\text{Cl}_6\cdot\text{H}_2\text{O}$  microparticles:**  $(\text{Im-BDMPA})\text{In}_{0.78}\text{Sb}_{0.22}\text{Cl}_6\cdot\text{H}_2\text{O}$  crystals were ground for 5 hours using an agate mortar and pestle. After that, the resulted powders were dispersed in ethanol solvent, which was then placed in a microwave digestion tank and heated in a microwave oven at 500 W for 20 h. Afterward, the suspension of  $(\text{Im-BDMPA})\text{In}_{0.78}\text{Sb}_{0.22}\text{Cl}_6\cdot\text{H}_2\text{O}$  was separated by centrifugation to get the microparticles. Finally, the resulted microparticles were washed by ethanol and dried in a vacuum drier at 50 °C for 30 h.

**Preparation of  $(\text{Im-BDMPA})\text{In}_{0.78}\text{Sb}_{0.22}\text{Cl}_6\cdot\text{H}_2\text{O}$  flexible films:** The flexible film was prepared by dissolving a silicone elastomer (Epoxy resin ab adhesive) and a cross-linker (Sylgard 184 elastomer kit, Dow Corning) in 10 mL acetone with stirring at room temperature for at 8 h to get a dispersed solution. Afterward,  $(\text{Im-BDMPA})\text{In}_{0.78}\text{Sb}_{0.22}\text{Cl}_6\cdot\text{H}_2\text{O}$  microparticles were added into the mixture and stirred for 15 hours. Then the solution was poured into a polytetrafluoroethylene mold, which was placed into a vacuum oven and dried at 50 °C overnight to evaporate the solvent.

**Single crystal X-ray diffraction:** The single crystal data of  $(\text{Im-BDMPA})\text{InCl}_6\cdot\text{H}_2\text{O}$  was collected on the Bruker Apex II CCD diffractometer with  $\text{Cu-K}\alpha$  radiation ( $\lambda = 1.3405$ ) at room temperature. All the non-hydrogen atoms were refined with anisotropic thermal parameters, and hydrogen atoms of organic molecules were positioned geometrically and refined isotropically. Structural refinement parameters of compound  $(\text{Im-BDMPA})\text{InCl}_6\cdot\text{H}_2\text{O}$  (CCDC number 2233592) is summarized in Table S5 and important bond parameters are listed in Table S6-S7.

**Common characterizations:** The powder X-ray diffraction (PXRD) analysis was performed on

---

Bruker D8 ADVANCE powder X-ray diffractometer equipped with copper  $K\alpha$  radiation at a voltage of 40 kV. The solid state UV-Vis absorption optical spectrum was collected at PE Lambda 900 UV/Vis spectrophotometer at room temperature in wavelength range of 200-800 nm. The PL spectrum, PLQY measurement and time-resolved decay data were performed on an Edinburgh FLS980 fluorescence spectrometer. The corresponding Commission Internationale Eclairage (CIE) chromaticity coordinates are calculated based on emission spectrum. The thermogravimetric analysis (TGA) was carried out on a Mettler TGA/SDTA 851 thermal analyzer in the temperature range of 30-800°C under the constant protection of  $N_2$  atmosphere flow. The Raman measurement was performed on powder sample in the range of 50-4000  $cm^{-1}$  by using Horiba Scientific LabRam HR Evolution under 365 nm excitation wavelength. The contents of elements (C, N, H) were determined by elemental quantitative analysis (EA) on a Elementar: Vario EL cube. Elemental mapping was conducted on a scanning electron microscope (SEM, Zeiss Merlin Compact). The X-ray photoelectron spectroscopy (XPS) spectra were tested on the Escalab XI instrument. Inductively coupled plasma optical emission spectrometer measurement (ICP-OES) was performed on Agilent 5110. The X-ray photoelectron spectroscopy (XPS) spectrum was tested on the Escalab XI instrument, USA. SEM and DEX images were performed in Hitachi SU-8010 field emission scanning electron microscopy. By using the one-oscillator model and assuming a linear relationship between thermal expansion and temperature, the temperature-dependent PL emission energy evolution is fitted by the follow equation:

$$E_g(T) = E_0 + A_{TE}T + A_{EP} \left[ \frac{2}{\exp\left(\frac{h_w}{K_B T}\right) - 1} + 1 \right]$$

where  $E_0$  is the unrenormalized band gap,  $E_g(T=0) = E_0 + A_{EP}$ ;  $A_{TE}$  and  $A_{EP}$  are the weight of TE

---

and EP interactions, respectively;  $\hbar\omega$  is the average optical phonon energy; and  $k_B$  is Boltzmann's constant.

**Fabrication of white LED lamp:** The white LED lamp device was fabricated by coating the mixture of yellow phosphor (Im-BDMPA)In<sub>0.78</sub>Sb<sub>0.22</sub>Cl<sub>6</sub>·H<sub>2</sub>O and commercial BaMgAl<sub>10</sub>O<sub>17</sub>:Eu<sup>2+</sup> blue phosphor on a 365 nm UV LED chip. These two phosphors were mixed with epoxy resin and stirred continuously for 15 min. Then the mixture was coated on the surface of the UV LED chip and cured for 30 min under vacuum conditions. The optical properties of the fabricated WLED was evaluated by a temperature-programmed LED optoelectronic analyzer with an integrating sphere (EVERFINE HAAS-2000).

**X-Ray property characterization:** The absorption coefficient ( $\alpha$ ) toward X-ray is mainly determined by the effective atomic number ( $Z_{\text{eff}}$ ) as  $\alpha \propto \rho Z_{\text{eff}}^4/E^3$ , where  $\rho$  is mass density and  $E$  is the X-ray photon energy. The RL spectra were obtained on a FLS1000 fluorescence spectrometer equipped with an X-ray source (W-target, 12 W) at 50 kV. The X-ray imaging is acquired on a digital camera (CMOS), and edge spread function (ESF) is obtained from the slanted-edge profile of this X-ray image. The MTF profile is defined as follow:

$$MTF(v) = F(LSF(x)) = F\left(\frac{dESF(x)}{dx}\right)$$

where  $v$  is the spatial frequency, and  $x$  is the position of the pixels.

**Theoretical band calculation:** The single crystal data of (Im-BDMPA)In<sub>1-x</sub>Sb<sub>x</sub>Cl<sub>6</sub>·H<sub>2</sub>O were directly used to calculate the electronic band structure in CASTEP software. The total energy was calculated with density functional theory (DFT) using Perdew-Burke-Ernzerhof (PBE) generalized gradient approximation. Hence, the C-2s<sup>2</sup>2p<sup>2</sup>, N-2s<sup>2</sup>2p<sup>3</sup>, H-1s<sup>1</sup>, In-5s<sup>2</sup>5p, Sb-5s<sup>2</sup>5p<sup>3</sup> and Cl-3s<sup>2</sup>3p<sup>5</sup> orbital were adopted as valence electrons. The number of plane wave included in the basis sets was

---

determined by a cutoff energy of 320 eV and numerical integration of the Brillouin zone is performed using Monkhorst-Pack k-point sampling of  $2 \times 2 \times 2$ . Other calculating parameters and convergence criteria were set by the default values of the CASTEP cod.

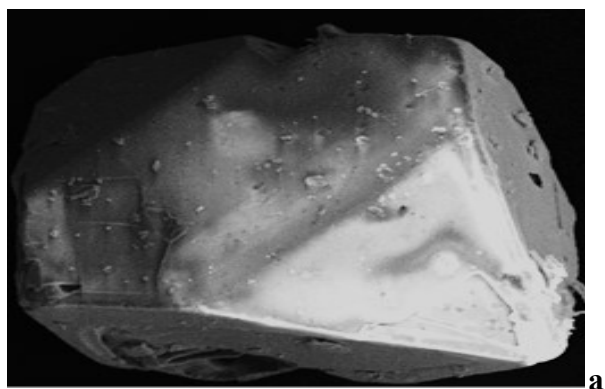

**a**

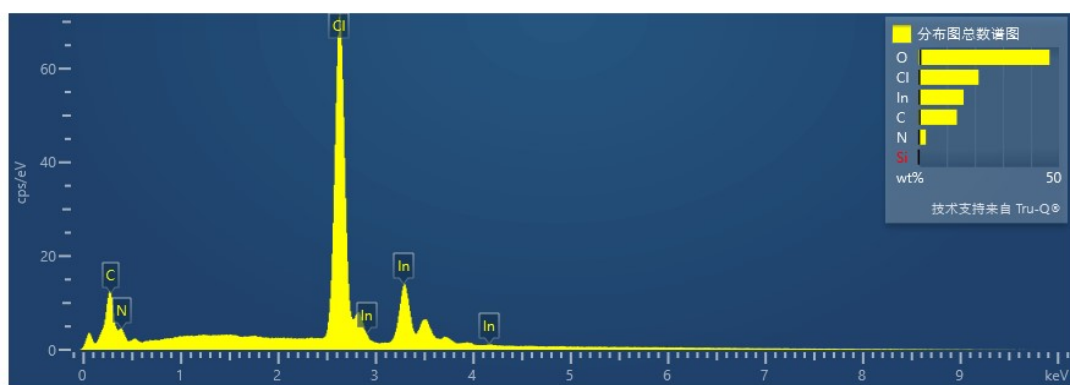

**b**

**Fig. S1** a) SEM photo image and b) EDS result of (Im-BDMPA)InCl<sub>6</sub>·H<sub>2</sub>O bulk crystal.

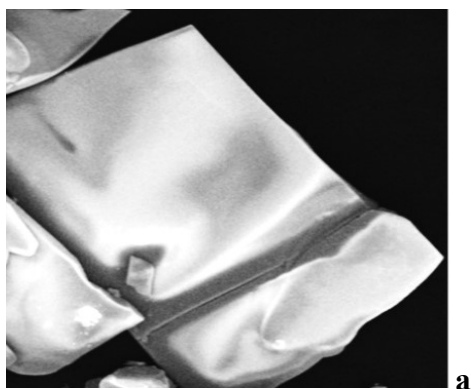

**a**

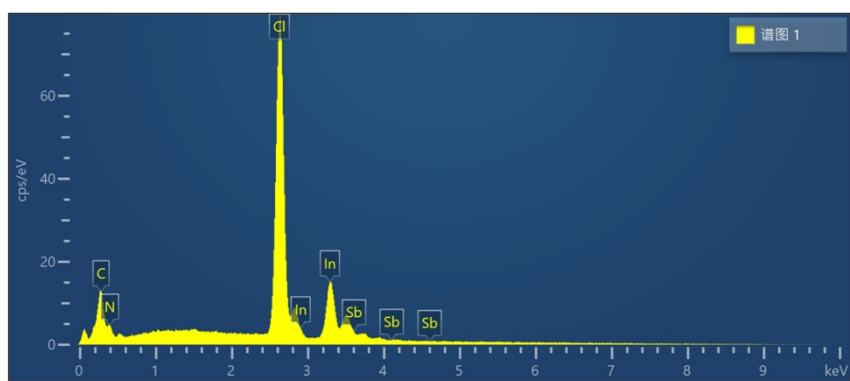

**b**

**Fig. S2** a) SEM photo image and b) EDS result of  $(\text{Im-BDMPA})\text{In}_{0.78}\text{Sb}_{0.22}\text{Cl}_6 \cdot \text{H}_2\text{O}$  bulk crystal.



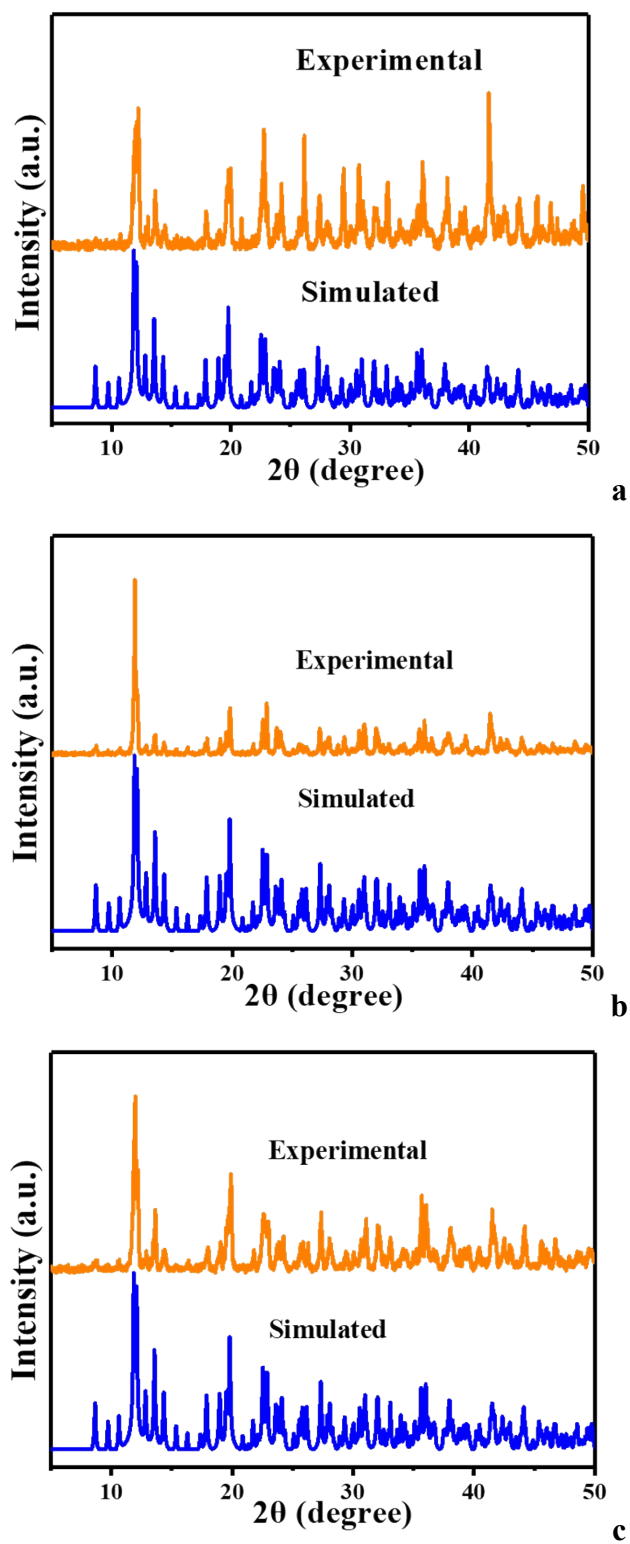

**Fig. S3** The simulated and experimental PXRD patterns of  $(\text{Im-BDMPA})\text{In}_{0.78}\text{Sb}_{0.22}\text{Cl}_6 \cdot \text{H}_2\text{O}$  a) microparticle, b) deposited thin film and c) flexible device.

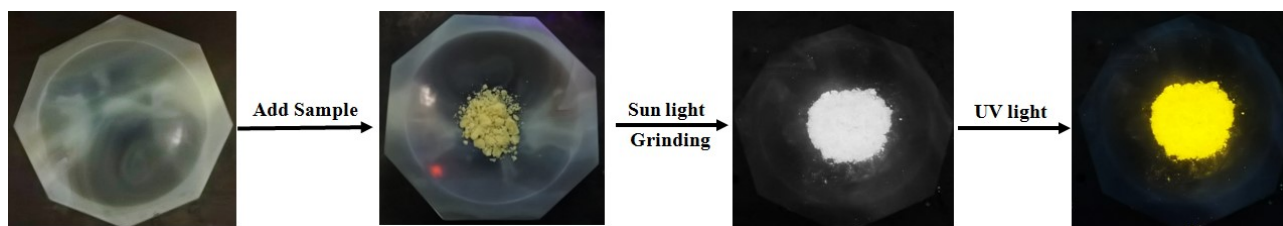

**Fig. S4** Photo images of solid-phase preparation process of  $(\text{Im-BDMPA})\text{In}_{0.78}\text{Sb}_{0.22}\text{Cl}_6 \cdot \text{H}_2\text{O}$ .

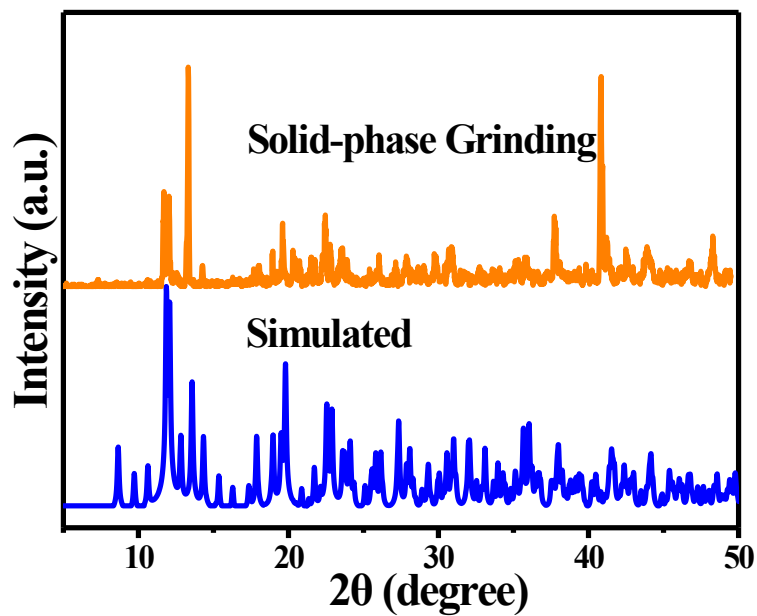

**Fig. S5** The PXRD pattern of  $(\text{Im-BDMPA})\text{In}_{0.78}\text{Sb}_{0.22}\text{Cl}_6 \cdot \text{H}_2\text{O}$  prepared from solid-phase mechanical grinding method.

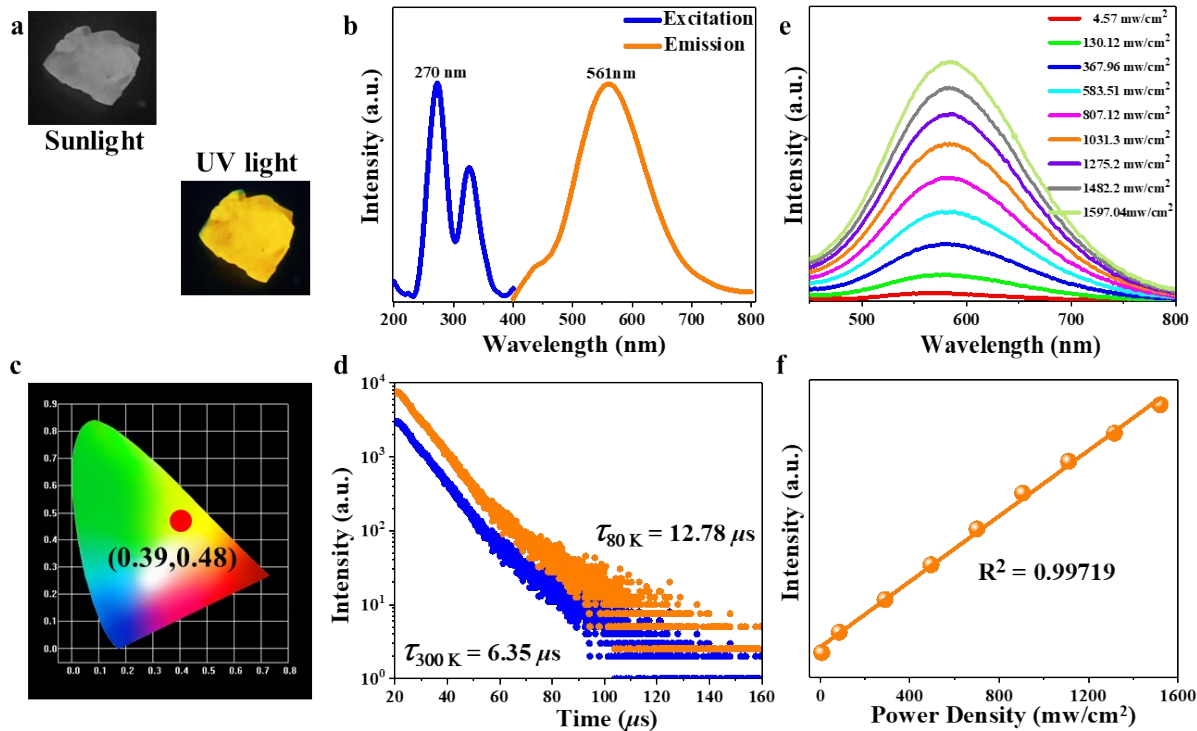

**Fig. S6** Systematical PL characterizations of (Im-BDMPA)InCl<sub>6</sub>·H<sub>2</sub>O bulk crystal: a) Photo images under sunlight and UV light; b) PLE and PL spectra; c) CIE coordinate; d) PL decay curves at 300 K and 80 K; e-f) Excitation power density dependent PL spectra.

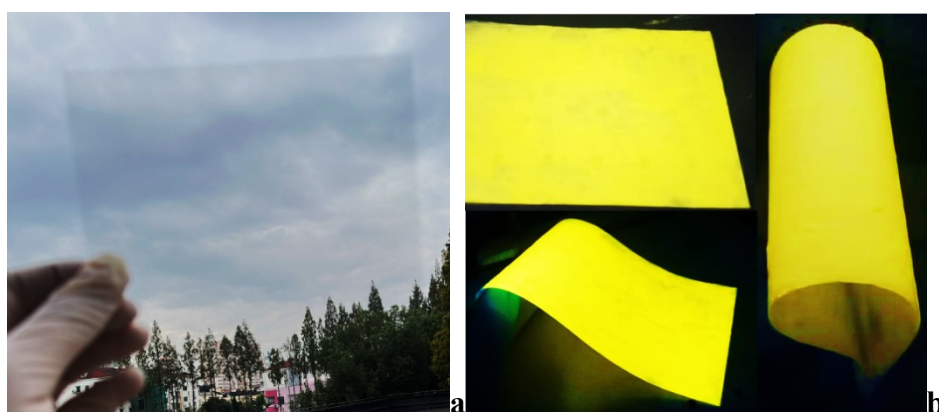

**Fig. S7** Photo images of deposited flexible device under sunlight (a) and 365 nm UV light (b).

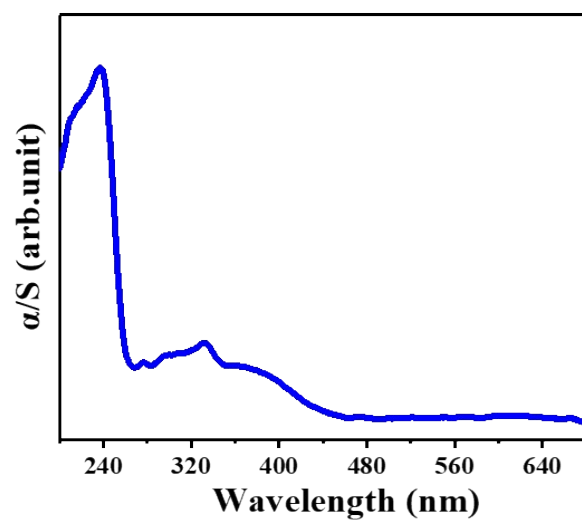

**Fig. S8** The solid state UV-Vis absorption optical spectra of (Im-BDMPA)InCl<sub>6</sub>·H<sub>2</sub>O.

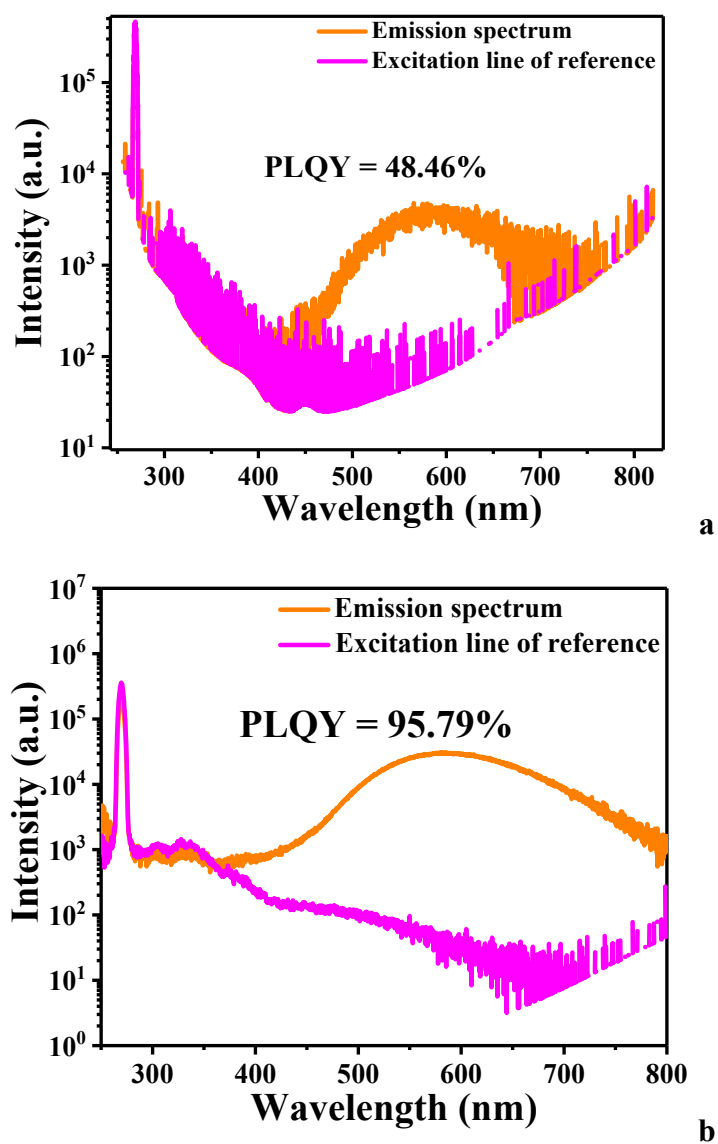

**Fig. S9** PLQYs of a) (Im-BDMPA)InCl<sub>6</sub>·H<sub>2</sub>O and b) (Im-BDMPA)In<sub>0.78</sub>Sb<sub>0.22</sub>Cl<sub>6</sub>·H<sub>2</sub>O bulk crystals.

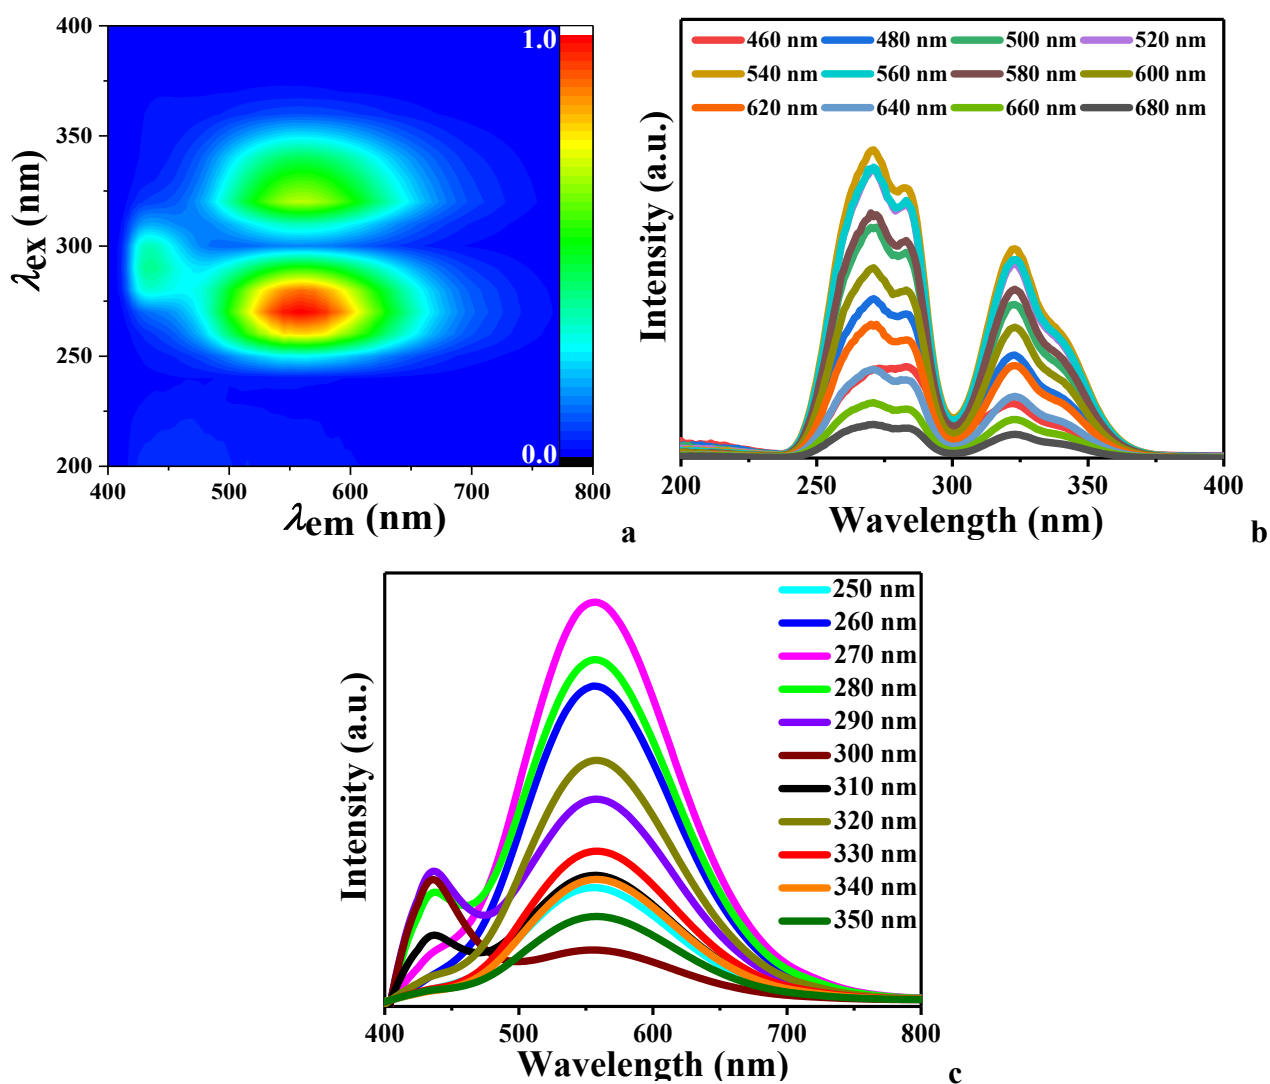

**Fig. S10** a) 3D consecutive PL excitation and emission spectrum; b) Emission wavelength dependent excitation spectra; c) Excitation dependent emission spectra of (Im-BDMPA)InCl<sub>6</sub>·H<sub>2</sub>O bulk crystal.

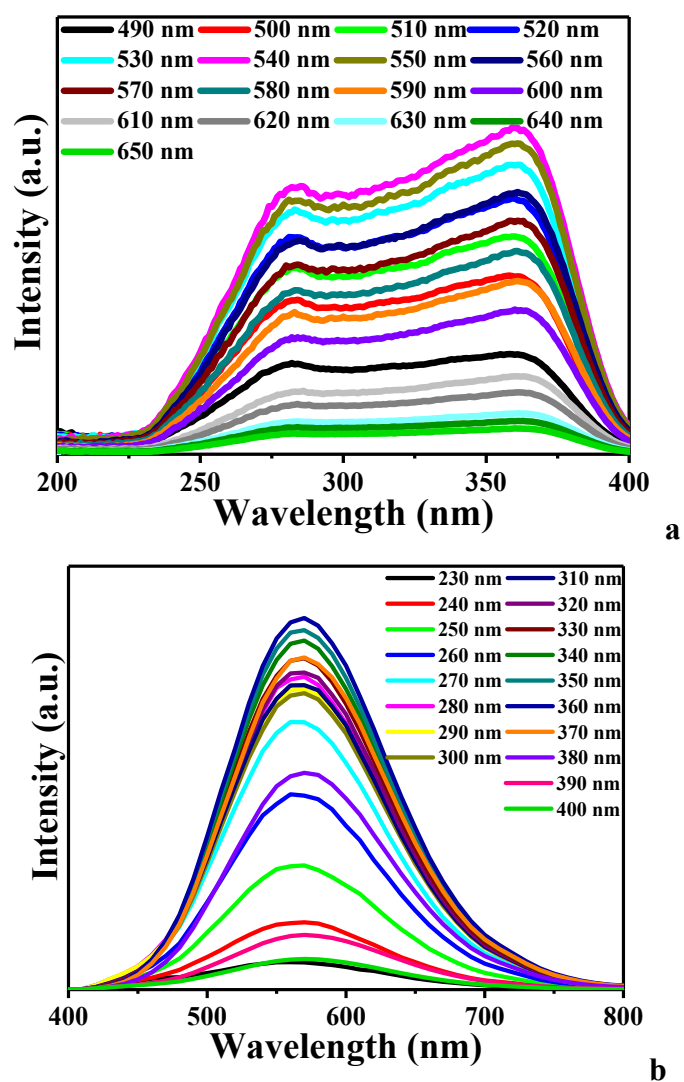

**Fig. S11** a) Emission wavelength dependent excitation spectra; b) Excitation dependent emission spectra of  $(\text{Im-BDMPA})\text{In}_{0.78}\text{Sb}_{0.22}\text{Cl}_6 \cdot \text{H}_2\text{O}$  bulk crystal.

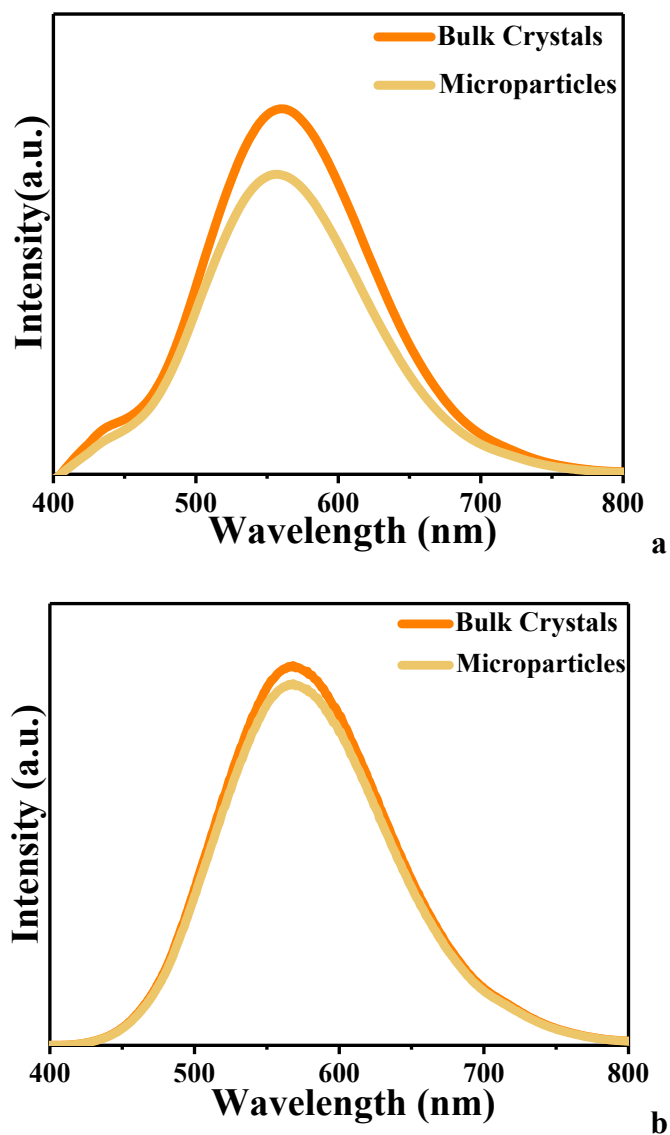

**Fig. S12** Comparison of PL emission spectra of bulk crystal and microparticles for a) (Im-BDMPA)InCl<sub>6</sub>·H<sub>2</sub>O and b) (Im-BDMPA)In<sub>0.78</sub>Sb<sub>0.22</sub>Cl<sub>6</sub>·H<sub>2</sub>O.



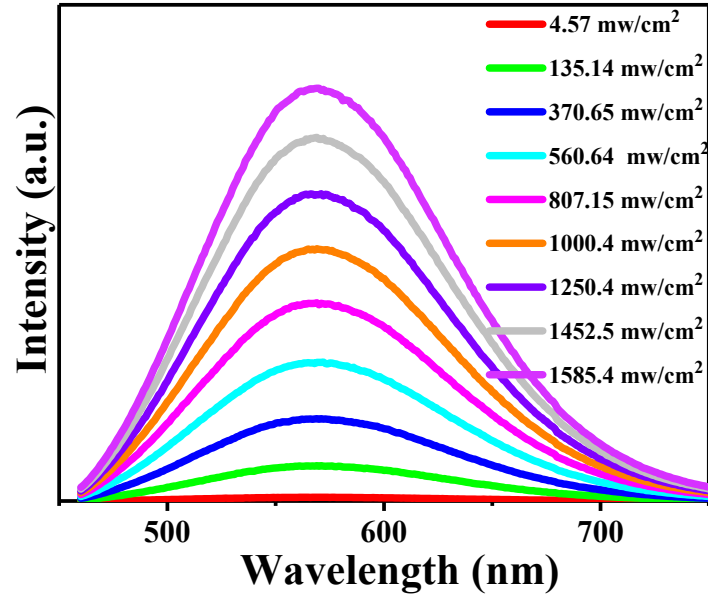

**Fig. S13** Excitation power density dependent PL emission spectra of (Im-BDMPA)In<sub>0.78</sub>Sb<sub>0.22</sub>Cl<sub>6</sub>·H<sub>2</sub>O bulk crystal.

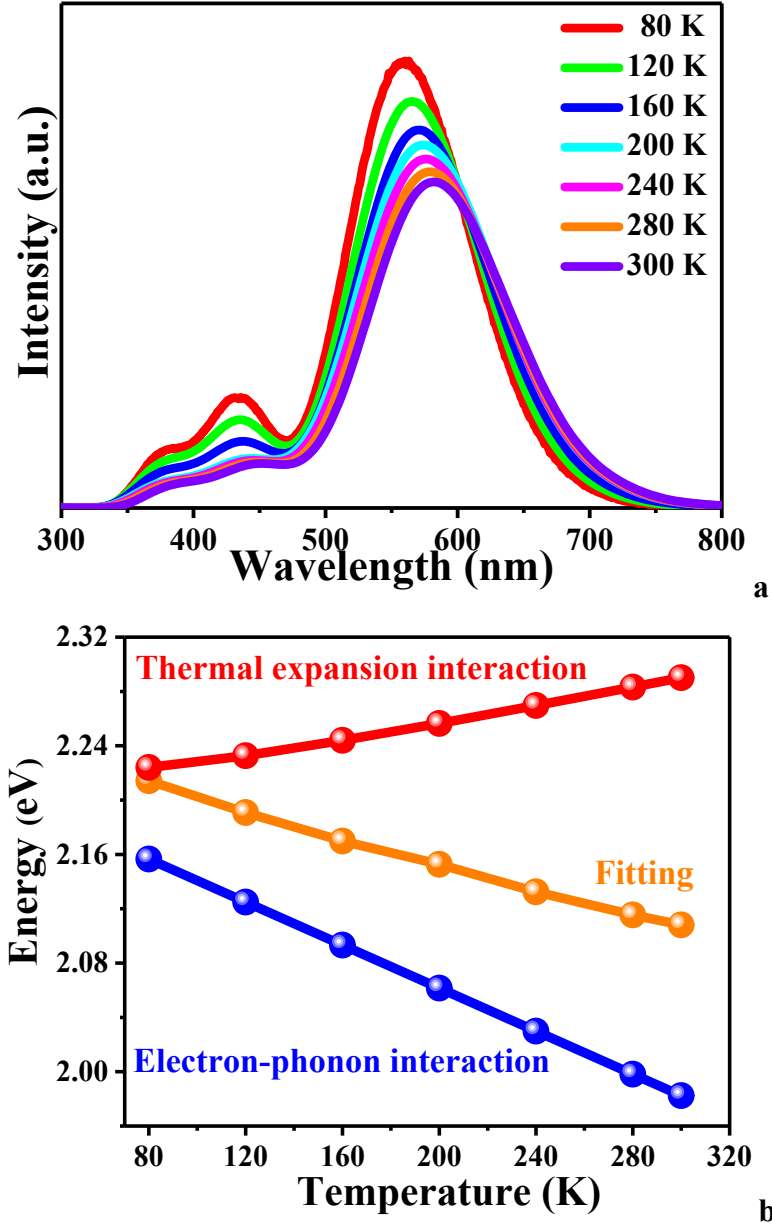

**Fig. S14** a) Temperature dependent PL emission spectra from 300 K to 80 K; b) Temperature-dependent PL energy evolution of with the contribution of thermal expansion and electronic-phonon interactions of  $(\text{Im-BDMPA})\text{In}_{0.78}\text{Sb}_{0.22}\text{Cl}_6 \cdot \text{H}_2\text{O}$  bulk crystal.

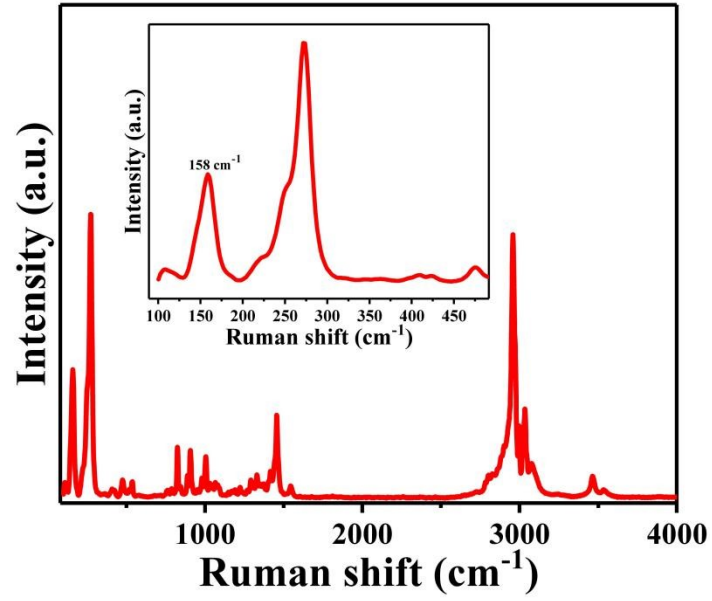

**Fig. S15** Raman spectrum of  $(\text{Im-BDMPA})\text{In}_{0.78}\text{Sb}_{0.22}\text{Cl}_6 \cdot \text{H}_2\text{O}$  bulk crystal.

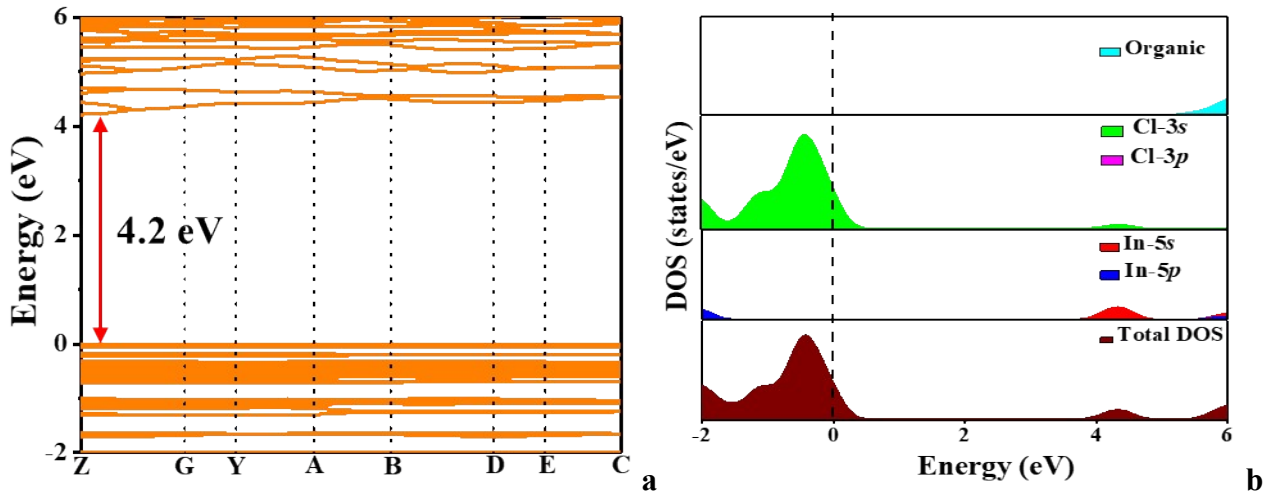

**Fig. S16** Electronic band structure (a) and density of states (b) of  $(\text{Im-BDMPA})\text{InCl}_6 \cdot \text{H}_2\text{O}$ .

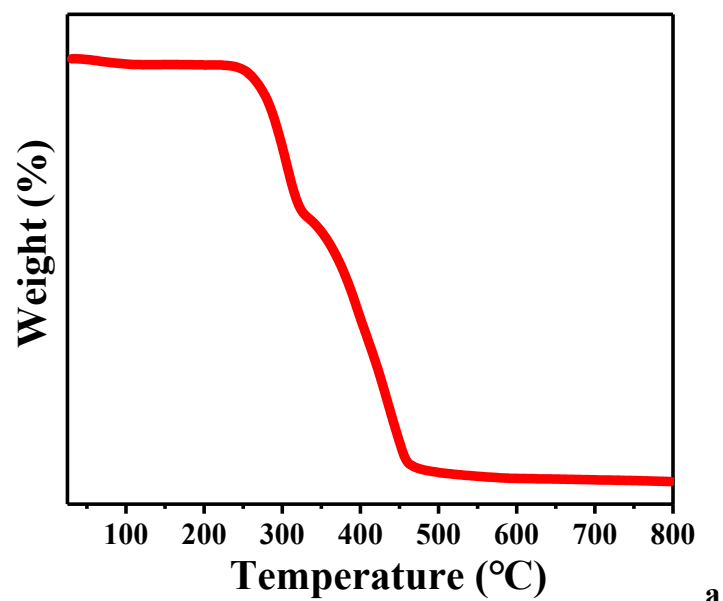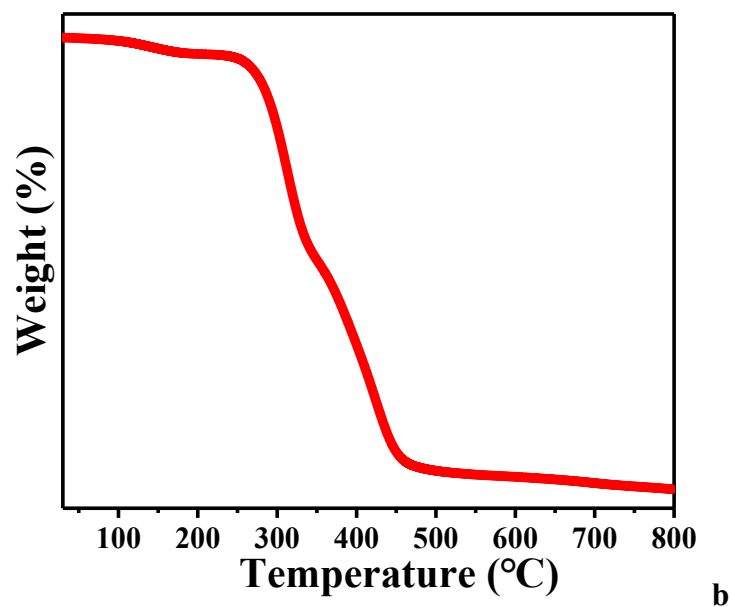

**Fig. S17** The thermogravimetric analysis curves of a) (Im-BDMPA)InCl<sub>6</sub>·H<sub>2</sub>O and b) (Im-BDMPA)In<sub>0.78</sub>Sb<sub>0.22</sub>Cl<sub>6</sub>·H<sub>2</sub>O.

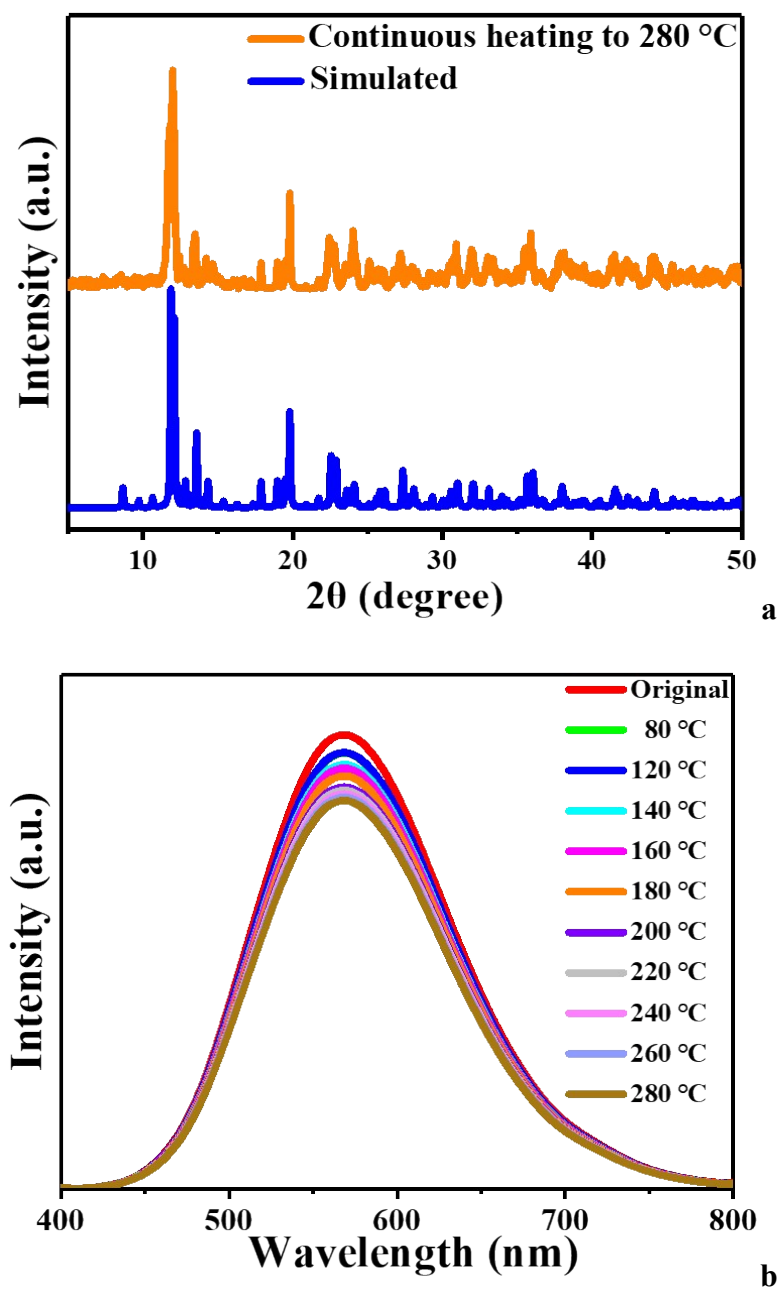

**Fig. S18** a) PXRD patterns and b) PL emission spectra of (Im-BDMPA)In<sub>0.78</sub>Sb<sub>0.22</sub>Cl<sub>6</sub>·H<sub>2</sub>O after continuous heating at different temperature.

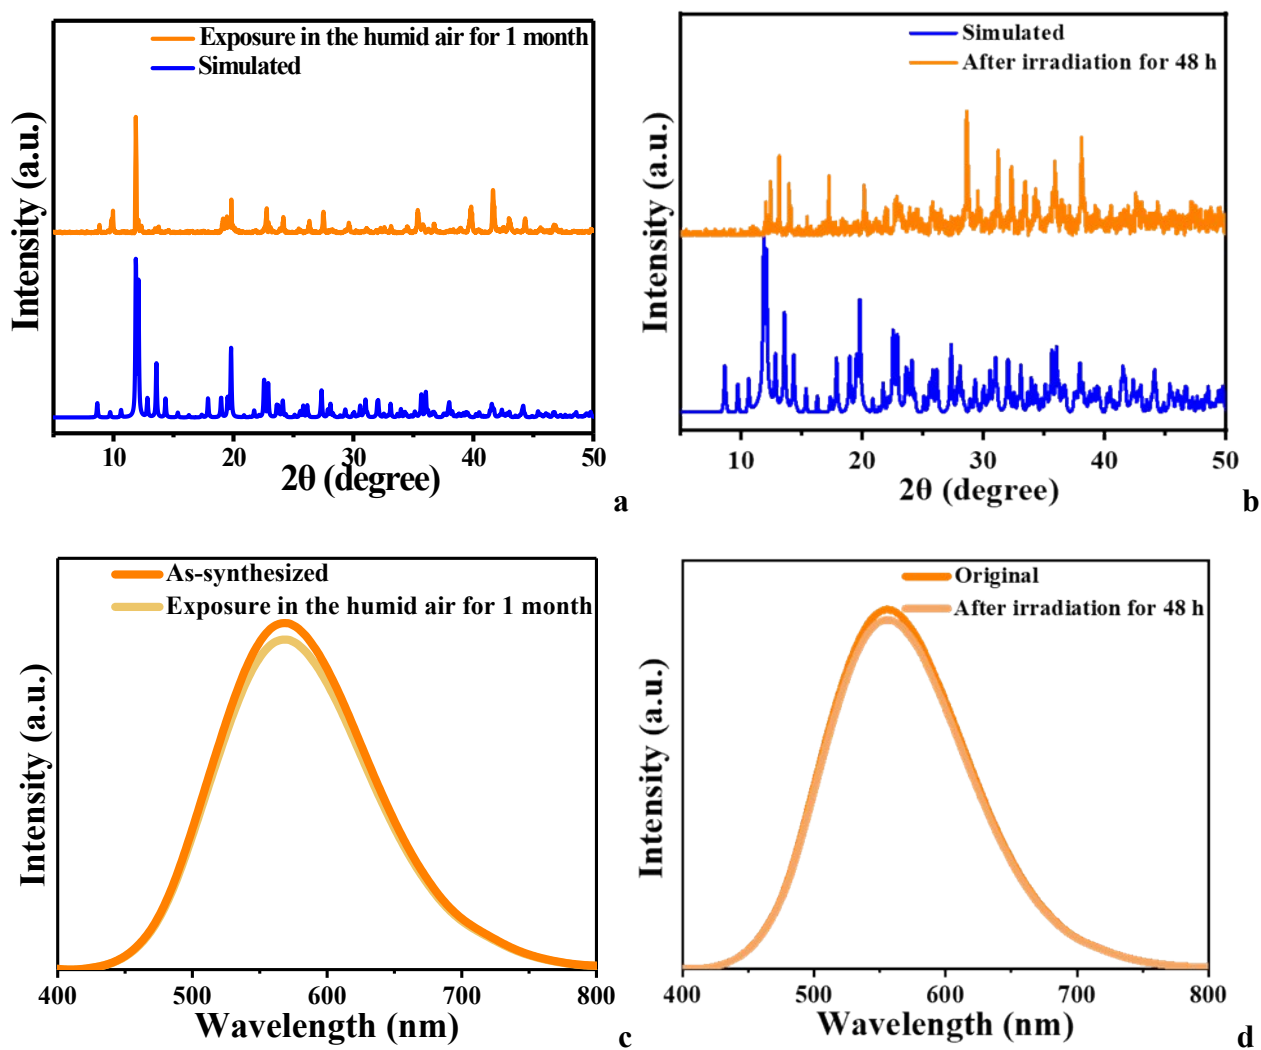

**Fig. S19** a-b) The experimental PXRD patterns and c-b) PL emission spectra of (Im-BDMPA) $\text{In}_{0.78}\text{Sb}_{0.22}\text{Cl}_6 \cdot \text{H}_2\text{O}$  after exposure in humid air for one month or under irradiation of strong UV light for 48 h.

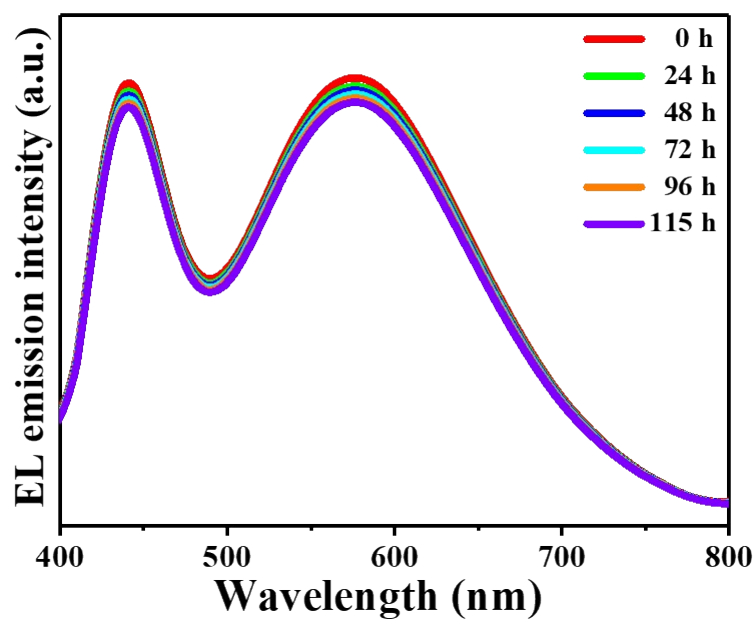

**Fig. S20** Time dependent EL emission spectra of fabricated white LED.

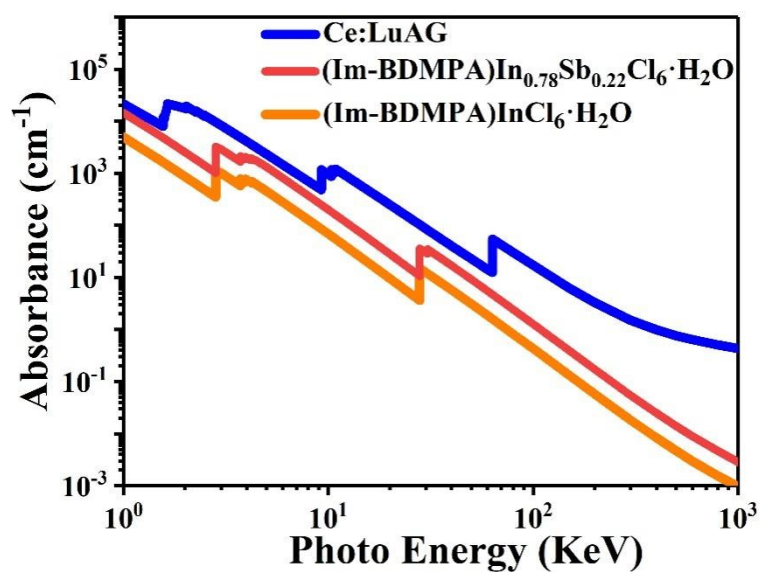

**Fig. S21** Absorption coefficients as a function of photon energy from 1 KeV to 1000 KeV of (Im-BDMPA)In<sub>1-x</sub>Sb<sub>x</sub>Cl<sub>6</sub>·H<sub>2</sub>O and Ce:LuAG.

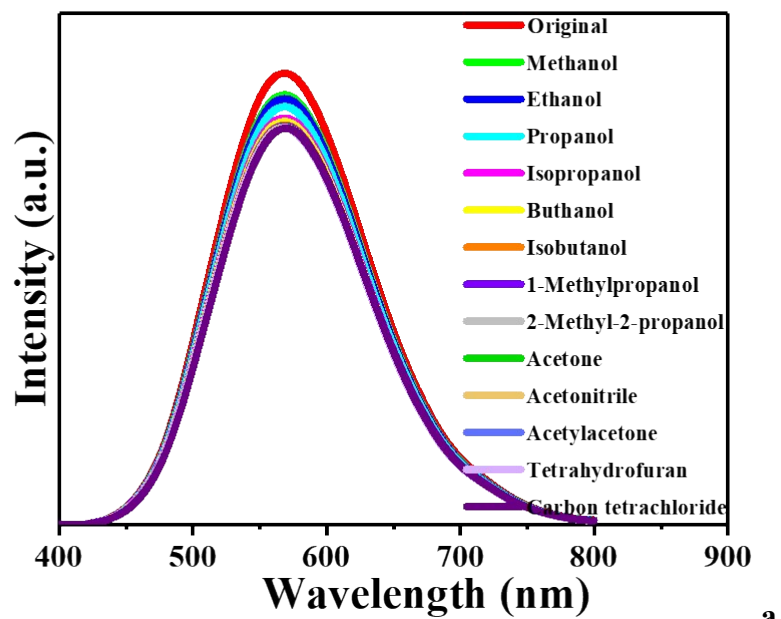

a

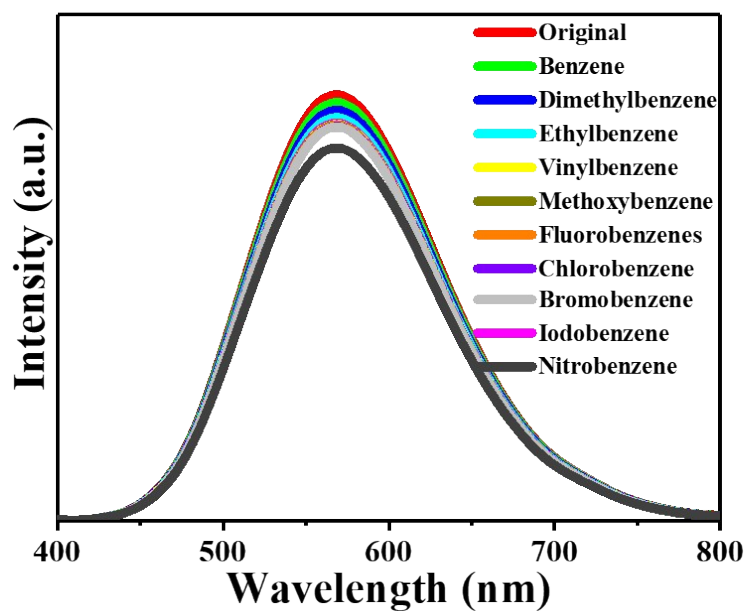

b

**Fig. S22** The PL emission spectra of  $(\text{Im-BDMPA})\text{In}_{0.78}\text{Sb}_{0.22}\text{Cl}_6 \cdot \text{H}_2\text{O}$  based thin film after soaking in various organic solvents.



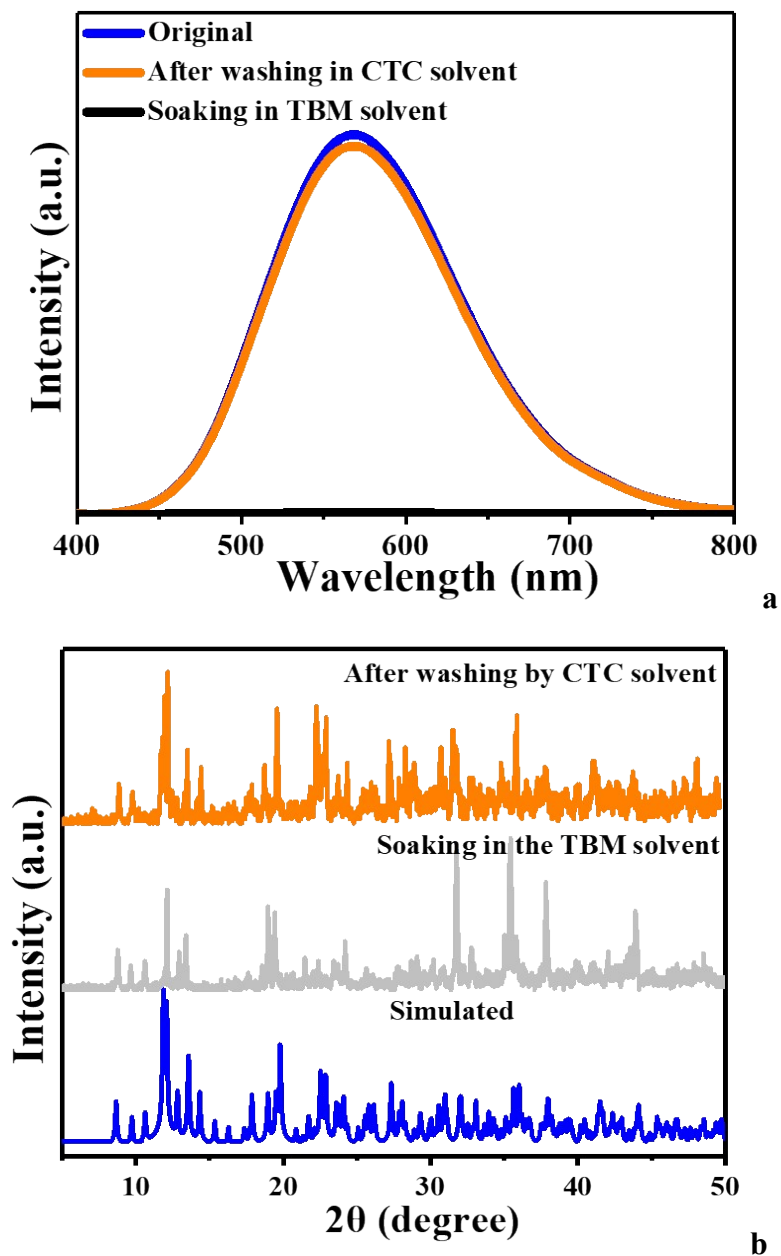

**Fig. S23** a) Comparisons of PL emission spectra and b) PXRD patterns of (Im-BDMPA)In<sub>0.78</sub>Sb<sub>0.22</sub>Cl<sub>6</sub>·H<sub>2</sub>O-based film after soaking-drying cycle in tribromethane (TBM) and carbon tetrachloride (CTC) with as-synthesized bulk crystal.

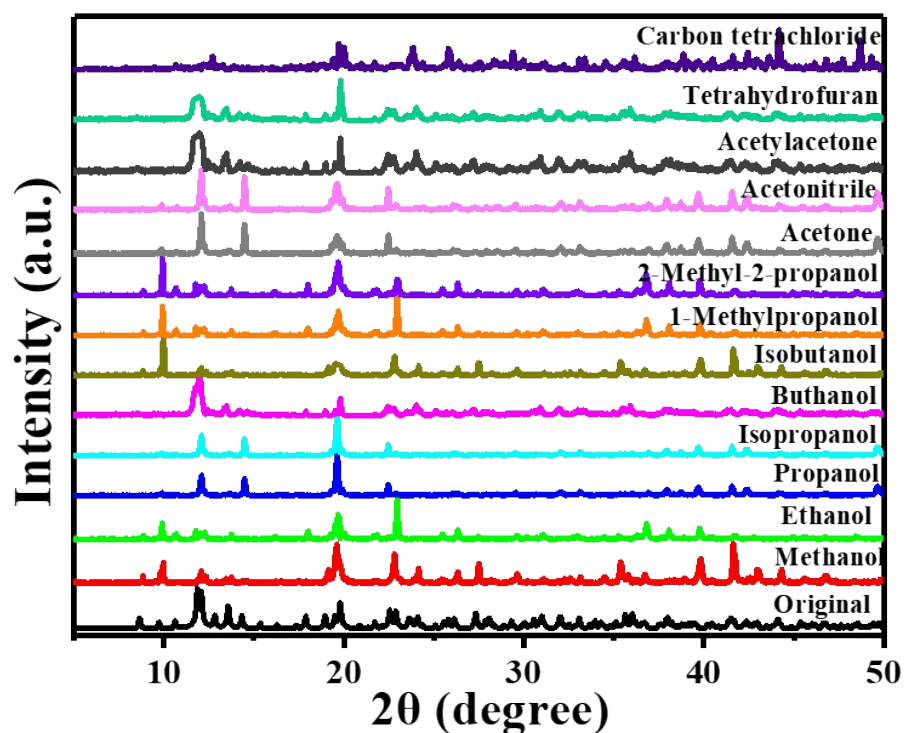

**Fig. S24** PXRD patterns of  $(\text{Im-BDMPA})\text{In}_{0.78}\text{Sb}_{0.22}\text{Cl}_6 \cdot \text{H}_2\text{O}$ -based thin film after soaking in various organic solvents.

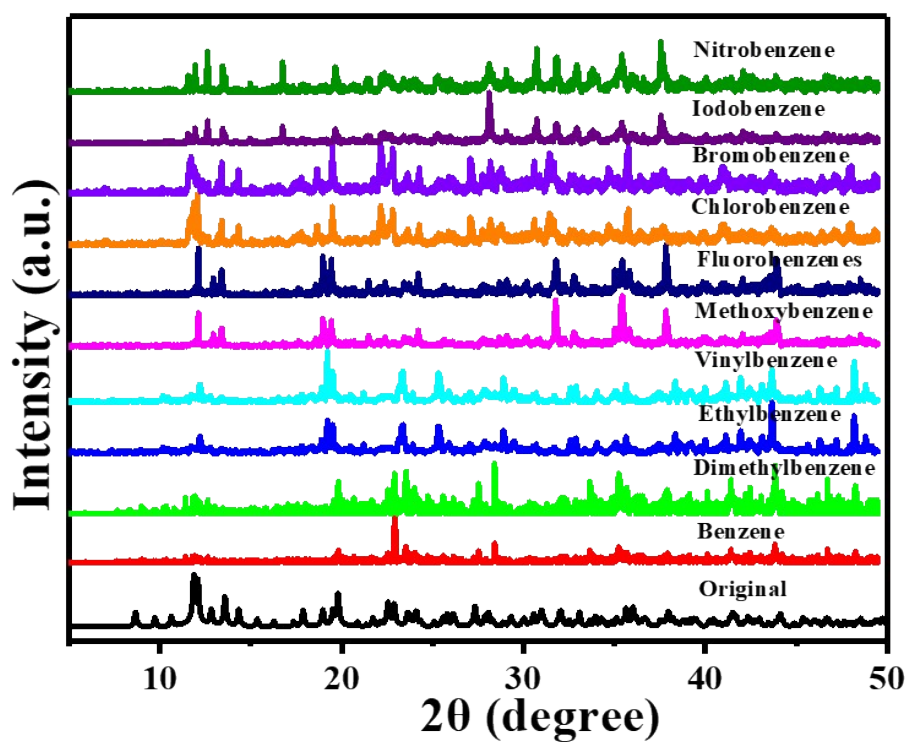

**Fig. S25** PXRD patterns of  $(\text{Im-BDMPA})\text{In}_{0.78}\text{Sb}_{0.22}\text{Cl}_6 \cdot \text{H}_2\text{O}$ -based thin film after soaking in various organic solvents.

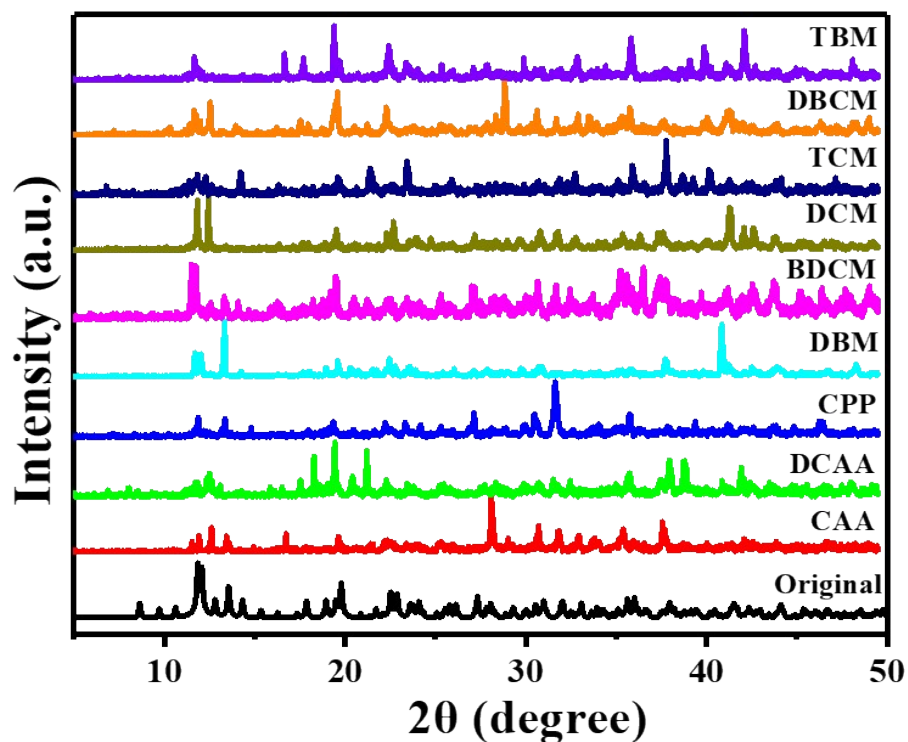

**Fig. S26** PXRD patterns of (Im-BDMPA) $\text{In}_{0.78}\text{Sb}_{0.22}\text{Cl}_6 \cdot \text{H}_2\text{O}$ -based thin film after soaking in various organic solvents of chloroacetic acid (CAA), dichloroacetic acid (DCAA), chloropropiophenone (CPP), dibromomethane (DBM), bromodichloromethane (BDCM), dichloromethane (DCM), trichloromethane (TCM), dibromo-monochloro-methane (DBCM), tribromomethane (TBM).

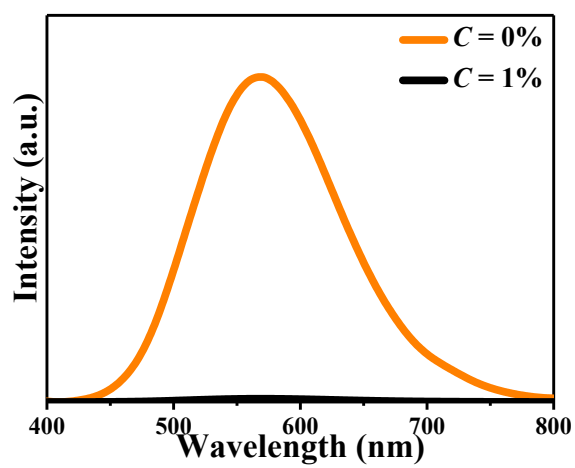

a

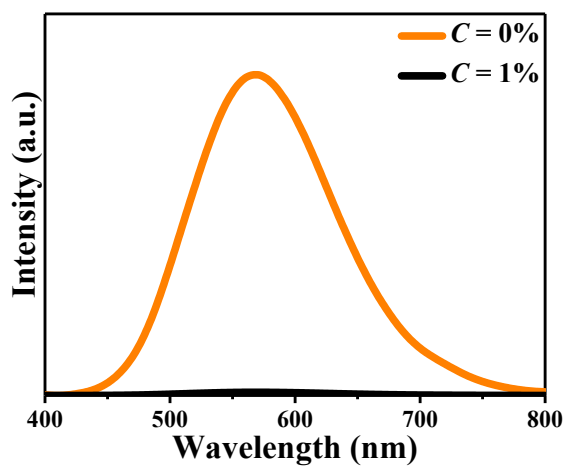

b

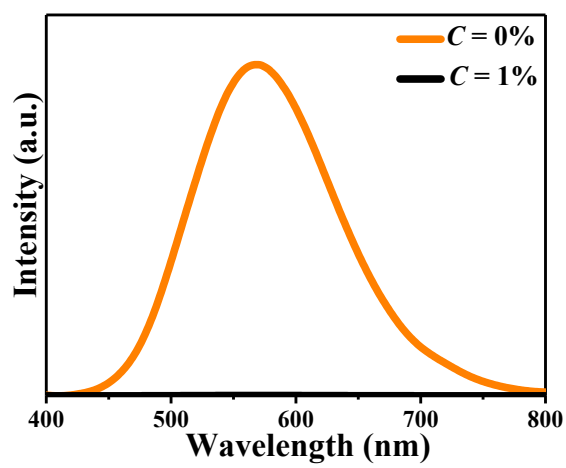

c

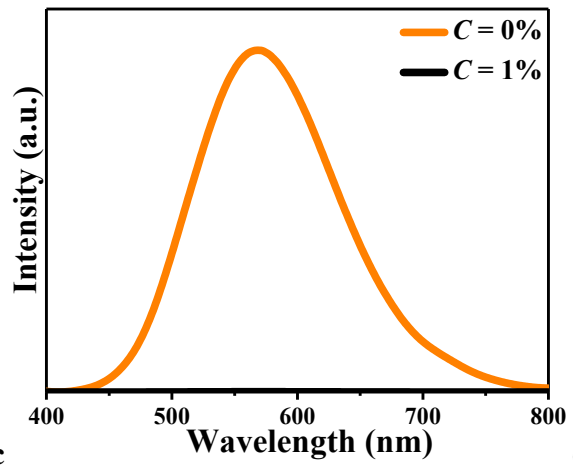

d

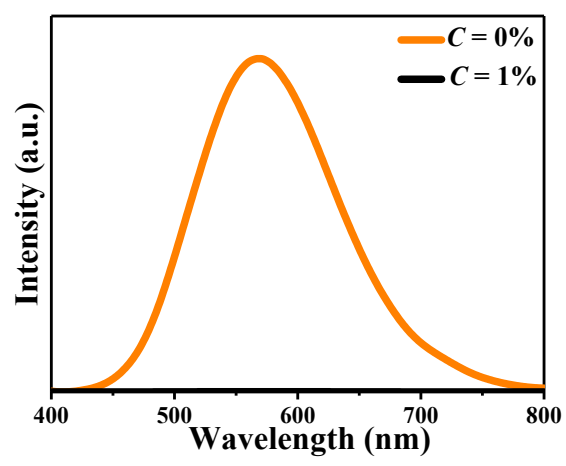

e

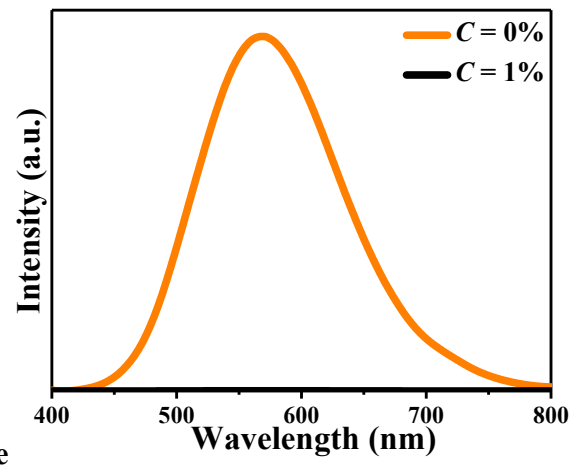

f

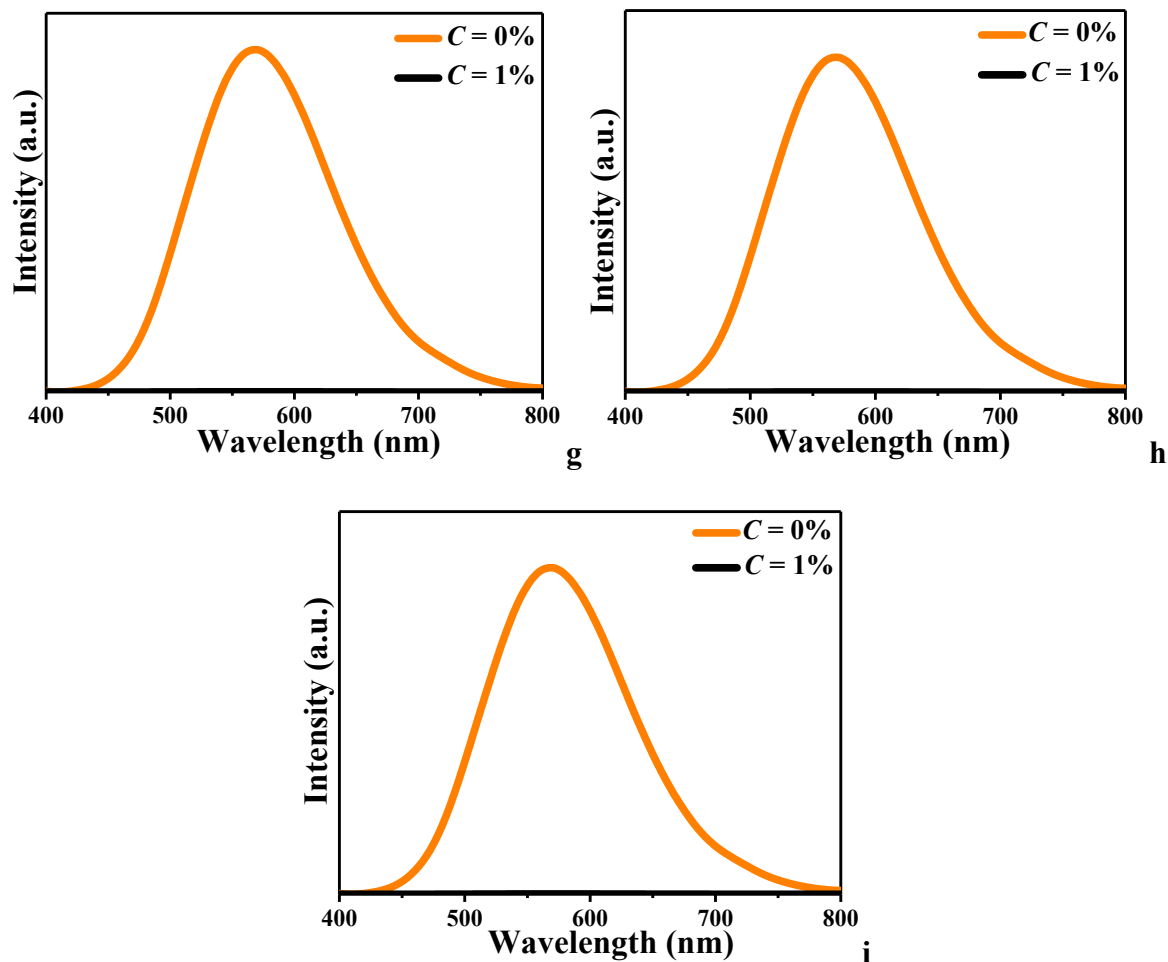

**Fig. S27** Comparison of PL emission spectra of  $(\text{Im-BDMPA})\text{In}_{0.78}\text{Sb}_{0.22}\text{Cl}_6 \cdot \text{H}_2\text{O}$ -based film toward TBM in various organic solvents including CAA (a), DCAA (b), CPP (c), DBM (d), BDCM (e), DCM (f), TCM (g), DBCM (h) and CTC (i) with concentrations of 0% and 1%.

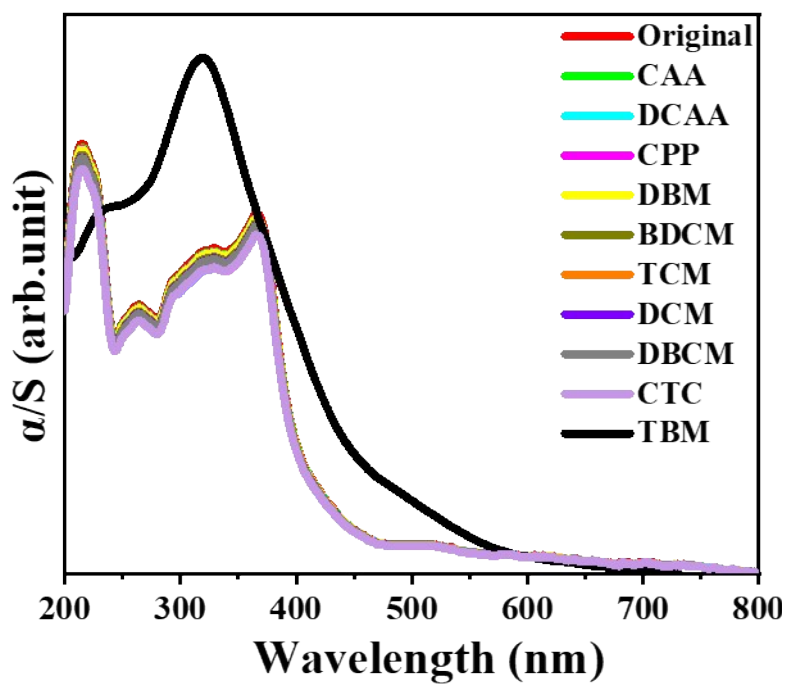

**Fig. S28** UV-vis absorption spectra of (Im-BDMPA)In<sub>0.78</sub>Sb<sub>0.22</sub>Cl<sub>6</sub>·H<sub>2</sub>O microcrystals after soaking in various organic solvents including chloroacetic acid (CAA), dichloroacetic acid (DCAA), chloropropiophenone (CPP), dibromomethane (DBM), bromodichloromethane (BDCM), dichloromethane (DCM), trichloromethane (TCM), dibromo-monochloro-methane (DBCM), tribromomethane (TBM).

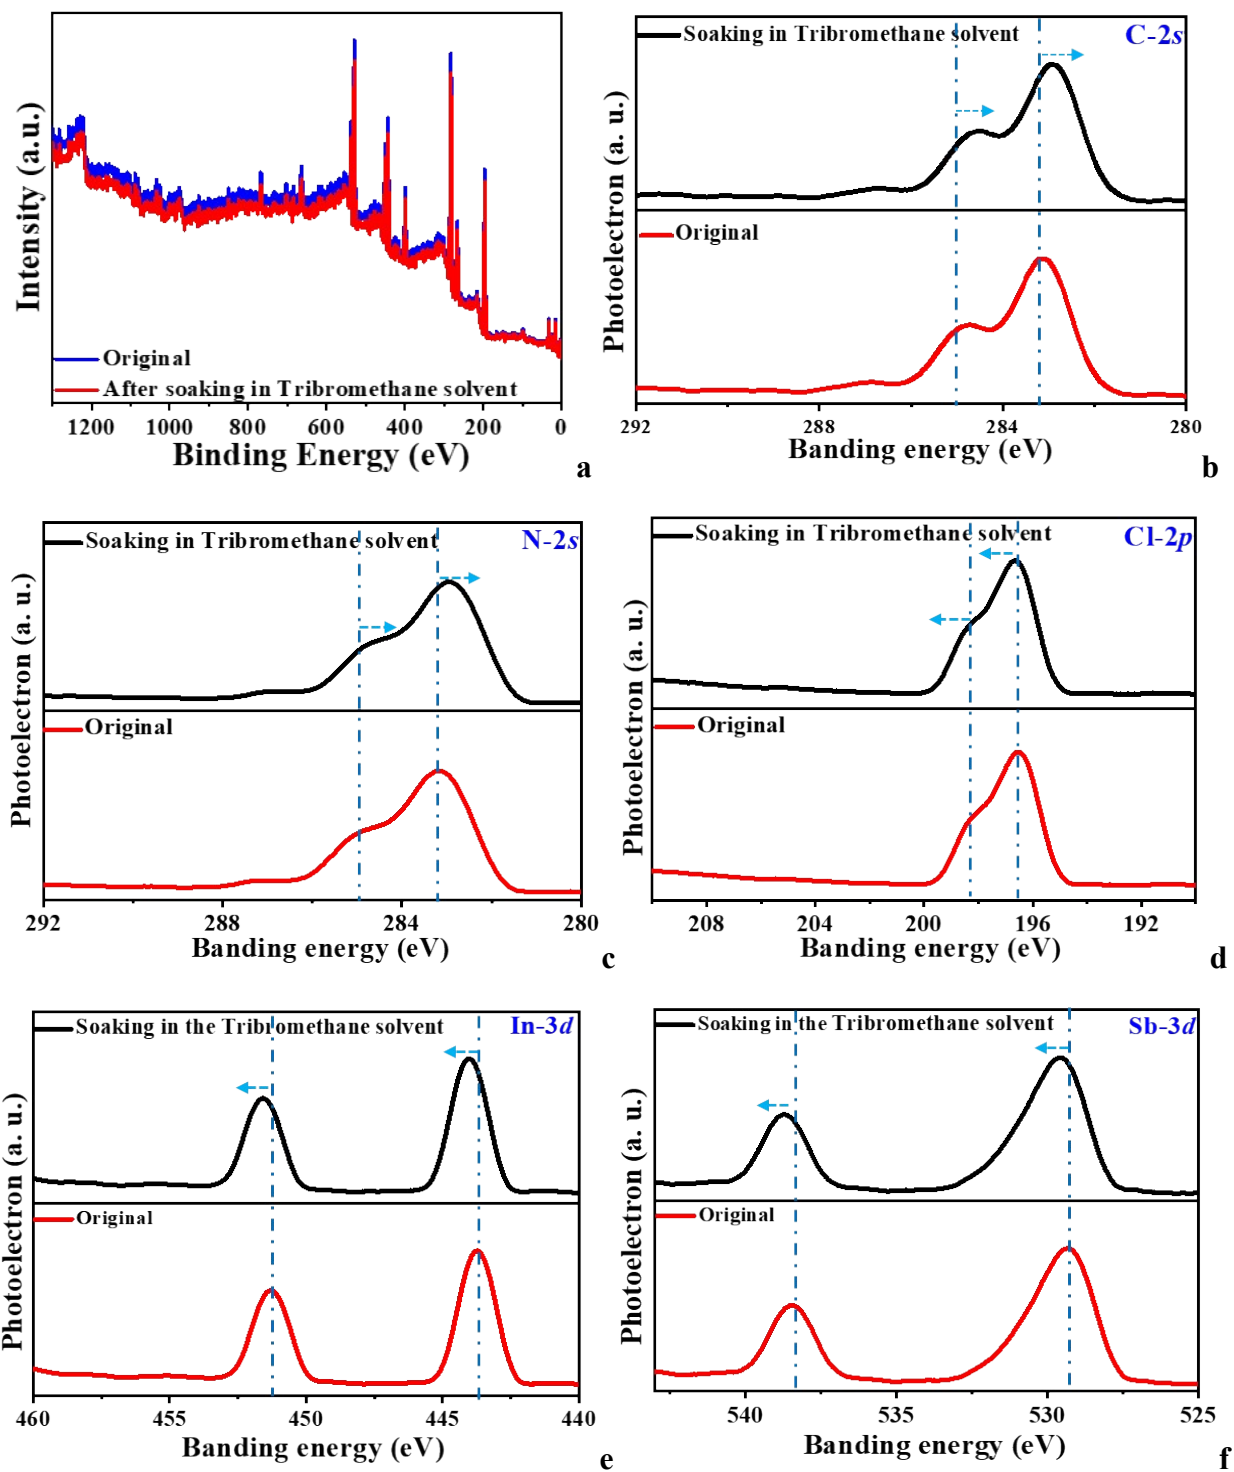

**Fig. S29** XPS spectra of  $(\text{Im-BDMPA})\text{In}_{0.78}\text{Sb}_{0.22}\text{Cl}_6 \cdot \text{H}_2\text{O}$  before and after soaking in tribromomethane.

**Table S1.** Summary of the PL properties of single crystalline indium perovskites.

| Material                                                                                   | Emission (nm) | PLQY (%)     | FWHM (nm)  | Lifetime ( $\mu$ s) | Ref.                                                      |
|--------------------------------------------------------------------------------------------|---------------|--------------|------------|---------------------|-----------------------------------------------------------|
| <b>(Im-BDMPA)In<sub>0.78</sub>Sb<sub>0.22</sub>Cl<sub>6</sub>·H<sub>2</sub>O</b>           | <b>570</b>    | <b>95.8</b>  | <b>135</b> | <b>7.85</b>         | <b>This work</b>                                          |
| Sb@Cs <sub>2</sub> InCl <sub>5</sub>                                                       | 550           | 95.5         | ---        | ---                 | <i>Adv. Opt. Mater.</i> <b>2021</b> , 13, 2002267.        |
| [MP] <sub>2</sub> In <sub>0.73</sub> Sb <sub>0.27</sub> Cl <sub>7</sub> ·6H <sub>2</sub> O | 525           | 93.34        | 107        | 6.746               | <i>Angew. Chem. Int. Ed.</i> <b>2022</b> , 61, e202206437 |
| Sb@Cs <sub>2</sub> KInCl <sub>6</sub>                                                      | 495           | 93           | --         | 0.26                | <i>Chem. Mater.</i> <b>2020</b> , 32, 5118-5124.          |
| Sb@[DAPEDA]InCl <sub>6</sub> ·Cl·H <sub>2</sub> O                                          | 530           | 89.29        | 114        | 4.94                | <i>CCS. Chem.</i> <b>2021</b> , 3, 3341-3356.             |
| Sb@[DPA] <sub>3</sub> InCl <sub>6</sub>                                                    | 520           | 85.84        | 113        | 4.45                | <i>CCS. Chem.</i> <b>2021</b> , 3, 3341-3356.             |
| Sb@Cs <sub>2</sub> InCl <sub>5</sub> ·H <sub>2</sub> O                                     | 610           | 73           | 164        | 4.2                 | <i>CCS. Chem.</i> <b>2020</b> , 2, 216-224.               |
| Sb@Cs <sub>2</sub> InBr <sub>5</sub> ·H <sub>2</sub> O                                     | 692           | 54.2         | 207        | --                  | <i>CCS. Chem.</i> <b>2020</b> , 2, 216-224.               |
| [MP] <sub>2</sub> InCl <sub>7</sub> ·6H <sub>2</sub> O                                     | 512           | 49.06        | 111        | 2.28                | <i>Angew. Chem. Int. Ed.</i> <b>2022</b> , 61, e202206437 |
| <b>(Im-BDMPA)InCl<sub>6</sub>·H<sub>2</sub>O</b>                                           | <b>561</b>    | <b>48.46</b> | <b>134</b> | <b>6.35</b>         | <b>This work</b>                                          |
| [DAPEDA]InCl <sub>6</sub> ·Cl·H <sub>2</sub> O                                             | 520           | 40.40        | 116        | 3.31                | <i>CCS. Chem.</i> <b>2021</b> , 3, 3341-3356.             |
| (PMA) <sub>3</sub> InBr <sub>6</sub>                                                       | 610           | 35           | 132        | 1.26                | <i>Inorg. Chem.</i> <b>2019</b> , 22, 15602-15609.        |
| [DPA] <sub>3</sub> InCl <sub>6</sub>                                                       | 510           | 34.01        | 108        | 3.18                | <i>CCS. Chem.</i> <b>2021</b> , 3, 3341-3356.             |
| Cs <sub>2</sub> InBr <sub>5</sub> ·H <sub>2</sub> O                                        | 695           | 33           | --         | 1.65                | <i>Angew. Chem. Int. Ed.</i> <b>2019</b> , 58, 5277-5281. |

PMA = C<sub>6</sub>H<sub>5</sub>CH<sub>2</sub>NH<sub>3</sub>; DAPEDA = C<sub>8</sub>H<sub>22</sub>N<sub>4</sub>; DPA = C<sub>6</sub>H<sub>15</sub>N.



**Table S2.** Summary of CIE chromaticity coordinates, CCT and CRI of mixed (Im-BDMPA)In<sub>1-x</sub>Sb<sub>x</sub>Cl<sub>6</sub>·H<sub>2</sub>O and BaMgAl<sub>10</sub>O<sub>17</sub>:Eu<sup>2+</sup> with different ratios.

|   | CIE chromaticity coordinates | CCT (K) | CRI  |
|---|------------------------------|---------|------|
| 1 | (0.29,0.25)                  | 9520    | 95.4 |
| 2 | (0.31,0.30)                  | 9110    | 94.2 |
| 3 | (0.32,0.30)                  | 8990    | 94.7 |
| 4 | (0.33,0.33)                  | 6200    | 96.4 |
| 5 | (0.34,0.34)                  | 5500    | 95.4 |
| 6 | (0.34,0.35)                  | 4120    | 94.2 |
| 7 | (0.36,0.36)                  | 3700    | 95.1 |
| 8 | (0.38,0.36)                  | 3320    | 94.5 |

**Table S3.** Summary of CIE chromaticity coordinates, CCT and CRI of white LED under different current.

| Current (mA) | CIE chromaticity coordinates | CCT (K) | CRI  |
|--------------|------------------------------|---------|------|
| 20           | (0.33,0.34)                  | 4250    | 93.1 |
| 40           | (0.34,0.33)                  | 4370    | 92.5 |
| 60           | (0.33,0.33)                  | 4420    | 94.3 |
| 80           | (0.34,0.34)                  | 4470    | 93.6 |
| 100          | (0.35,0.34)                  | 4530    | 94.4 |
| 120          | (0.35,0.33)                  | 4590    | 95.4 |

**Table S4.** Summary of X-ray scintillation performance of 0D hybrid metal halides.

| Materials                                                                        | Grow method                        | Maximum emission (nm) | Light yield (photons/MeV) | Detection limit ( $\mu\text{Gy/s}$ ) | Ref.             |
|----------------------------------------------------------------------------------|------------------------------------|-----------------------|---------------------------|--------------------------------------|------------------|
| <b>(Im-BDMPA)In<sub>0.78</sub>Sb<sub>0.22</sub>Cl<sub>6</sub>·H<sub>2</sub>O</b> | <b>Solution method</b>             | <b>569</b>            | <b>55320</b>              | <b>0.0853</b>                        | <b>This work</b> |
| CsI(Tl)                                                                          | Non-vacuum crucible descent        | 550                   | 54000                     | ---                                  | 1                |
| Cs <sub>3</sub> Cu <sub>2</sub> I <sub>5</sub> : single crystal                  | Bridgman method                    | 500                   | 51000                     | ---                                  | 2                |
| (PPN) <sub>2</sub> SbCl <sub>5</sub>                                             | Antisolvent diffusion              | 635                   | 49000                     | 0.194                                | 3                |
| CsI(Na)                                                                          | Non-vacuum crucible descent        | 420                   | 41000                     | ---                                  | 4                |
| $\beta$ -Cs <sub>3</sub> Cu <sub>2</sub> Cl <sub>5</sub>                         | Hot-injection                      | 525                   | 34000                     | 0.1746                               | 5                |
| LYSO                                                                             | Medium frequency induction heating | 410                   | 33000                     | ---                                  | 6                |
| Cs <sub>3</sub> Cu <sub>2</sub> I <sub>5</sub> single crystal                    | Bridgman method                    | 440                   | 32000                     | ---                                  | 7                |
| CdWO <sub>4</sub>                                                                | Pulling method                     | 480                   | 28000                     | ---                                  | 8                |
| K <sub>2</sub> CuBr <sub>3</sub> single crystal                                  | Cooling method                     | 391                   | 23806                     | 132.8                                | 9                |
| Ce:LuAG                                                                          | Float-zone method                  | 500                   | 25000                     | ---                                  | 10               |
| <b>(Im-BDMPA)InCl<sub>6</sub>·H<sub>2</sub>O</b>                                 | <b>Solution method</b>             | <b>570</b>            | <b>23047</b>              | <b>---</b>                           | <b>This work</b> |
| CsPbBr <sub>3</sub> QDs                                                          | Single-step injection              | 520                   | 21000                     | ---                                  | 10               |
| Rb <sub>2</sub> CuCl <sub>3</sub>                                                | Cooling method                     | 4001                  | 16600                     | 88.5                                 | 11               |

**Table S5.** Crystal Data and Structural Refinements for (Im-BDMPA)InCl<sub>6</sub>·H<sub>2</sub>O.

| Compound                                                                                          | (Im-BDMPA)InCl <sub>6</sub> ·H <sub>2</sub> O                     |
|---------------------------------------------------------------------------------------------------|-------------------------------------------------------------------|
| chemical formula                                                                                  | C <sub>10</sub> H <sub>28</sub> N <sub>3</sub> OInCl <sub>6</sub> |
| Fw                                                                                                | 533.887                                                           |
| Space group                                                                                       | <i>P</i> 2 <sub>1</sub> 2 <sub>1</sub> 2 <sub>1</sub>             |
| <i>a</i> /Å                                                                                       | 9.3561(1)                                                         |
| <i>b</i> /Å                                                                                       | 12.3477(2)                                                        |
| <i>c</i> /Å                                                                                       | 18.1889(3)                                                        |
| $\alpha$ /°                                                                                       | 90                                                                |
| $\beta$ /°                                                                                        | 90                                                                |
| $\gamma$ /°                                                                                       | 90                                                                |
| <i>V</i> (Å <sup>3</sup> )                                                                        | 2101.30(5)                                                        |
| <i>Z</i>                                                                                          | 4                                                                 |
| <i>D</i> <sub>calcd</sub> (g·cm <sup>-3</sup> )                                                   | 1.688                                                             |
| Temp (K)                                                                                          | 296.15                                                            |
| $\mu$ (mm <sup>-1</sup> )                                                                         | 1.899                                                             |
| <i>F</i> (000)                                                                                    | 1073                                                              |
| Reflections collected                                                                             | 26504                                                             |
| Unique reflections                                                                                | 6525                                                              |
| GOF on <i>F</i> <sup>2</sup>                                                                      | 1.017                                                             |
| <i>R</i> <sub>1</sub> , <i>wR</i> <sub>2</sub> ( <i>I</i> > 2 $\sigma$ ( <i>I</i> )) <sup>a</sup> | 0.0237, 0.0543                                                    |
| <i>R</i> <sub>1</sub> , <i>wR</i> <sub>2</sub> (all data)                                         | 0.0276, 0.0558                                                    |

<sup>a</sup>  $R_1 = \sum ||F_o| - |F_c|| / \sum |F_o|$ ,  $wR_2 = \{\sum w[(F_o)^2 - (F_c)^2]^2 / \sum w[(F_o)^2]^2\}^{1/2}$

---

**Table S6.** Selected bond lengths (Å) and bond angles (°) for (Im-BDMPA)InCl<sub>6</sub>·H<sub>2</sub>O.

|                      |           |             |           |
|----------------------|-----------|-------------|-----------|
| In1-Cl1              | 2.5009(6) | Cl1-In1-Cl6 | 91.68(2)  |
| In1-Cl2              | 2.5452(6) | Cl2-In1-Cl3 | 87.73(2)  |
| In1-Cl2 <sup>1</sup> | 2.5269(6) | Cl2-In1-Cl5 | 93.50(2)  |
| In1-Cl3              | 2.5231(6) | Cl2-In1-Cl6 | 175.15(2) |
| In1-Cl3 <sup>1</sup> | 2.5026(6) | Cl3-In1-Cl5 | 175.80(2) |
| In1-Cl4              | 2.5363(6) | Cl3-In1-Cl6 | 88.55(2)  |
|                      |           | Cl4-In1-Cl2 | 89.88(2)  |
| Cl1-In1-Cl2          | 85.39(2)  | Cl4-In1-Cl3 | 88.89(2)  |
| Cl1-In1-Cl3          | 92.76(2)  | Cl4-In1-Cl5 | 87.10(2)  |
| Cl1-In1-Cl4          | 174.93(2) | Cl4-In1-Cl6 | 93.16(2)  |
| Cl2-In1-Cl5          | 91.34(2)  | Cl6-In1-Cl5 | 90.43(2)  |

---

---

**Table S7.** Hydrogen bonds data for (Im-BDMPA)InCl<sub>6</sub>·H<sub>2</sub>O.

| D-H···A      | d(D-H)   | d(H···A)  | d(D···A) | <(DHA)     |
|--------------|----------|-----------|----------|------------|
| N2-H13···Cl3 | 0.900(3) | 2.828(2)  | 3.372(2) | 120.2(2)   |
| N2-H13···Cl6 | 0.900(3) | 2.828(2)  | 3.302(2) | 154.6(2)   |
| N2-H14···Cl2 | 0.900(3) | 2.730(2)  | 3.328(2) | 124.93(19) |
| N2-H14···Cl3 | 0.900(3) | 2.662(2)  | 3.492(2) | 153.7(2)   |
| O1-H27···N3  | 0.85(3)  | 2.05(3)   | 2.888(3) | 168(3)     |
| O1-H29···Cl4 | 0.85(3)  | 2.45(4)   | 3.276(3) | 164(3)     |
| C2-H4···Cl2  | 0.960(9) | 2.605(11) | 3.551(3) | 169.1(13)  |
| C4-H29···Cl5 | 0.970(3) | 2.714(3)  | 3.566(3) | 146.9(2)   |
| C3-H10···Cl3 | 0.970(4) | 2.714(3)  | 3.568(3) | 147.2(3)   |
| C9-H10···Cl5 | 0.970(4) | 2.714(4)  | 3.568(3) | 147.2(3)   |

---

---

## Reference

- [1] J. J. Ma, W. J. Zhu, L. Lei, D. G. Deng, Y. J. Hua, Y. M. Yang, S. Q. Xu, P. N. Prasad, *ACS Appl. Mater. Interfaces*. 2021, **13**, 44596-44603.
- [2] D. Yuan, *ACS Appl. Mater. Interfaces*. 2022, **12**, 38333-38340.
- [3] Q. He, C. Zhou, L. Xu, S. Lee, X. Lin, J. Neu, M. Worku, M. Chaaban, B. W. Ma, *ACS Mater. Lett.* 2020, **2**, 633-638.
- [4] G. F. Carpenter, M. J. Coe, A. R. Engel, *Nature*. 1976, **99**, 259.
- [5] Q. Zhou, J. W. Ren, J. W. Xiao, L. Lei, F. Y. Liao, H. P. Di, C. Wang, L. J. Yang, Q. Chen, X. F. Yang, Y. Y. Zhao, X. D. Han, *Nanoscale*. 2021, **13**, 19894.
- [6] R. J. Sun, Z. F. Wang, H. Q. Wang, Z. H. Chen, Y. G. Yao, H. P. Zhang, Y. N. Gao, X. T. Hao, H. Q. Liu, Y. H. Zhang, *ACS Appl. Mater. Interfaces*. 2022, **14**, 36801-36806.
- [7] S. Cheng, A. Beitlerova, R. Kucerkova, M. Nikl, G. Ren, Y. Wu, *Phys. Status Solidi RRL*. 2020, **14**, 2000374.
- [8] A. G. Gandhi, H. H. Chiu, M. K. Ho, T. E. Hsu, T. Y. Li, Y. H. Wu, B. V. Kumar, P. M. Reddy, B. H. Lin, C. L. Cheng, S. Y. Wu, *ACS Appl. Nano Mater.* 2022, **5**, 14811-14823.
- [9] W. Gao, G. Niu, L. Yin, B. Yang, J. H. Yuan, D. Zhang, K. H. Xue, X. Miao, Q. Hu, X. Du, *ACS Appl. Electron. Mater.* 2020, **2**, 2242-2249.
- [10] Y. H. Zhang, R. J. Sun, X. Y. Ou, K. F. Fu, Q. S. Chen, Y. C. Ding, L. J. Xu, L. M. Liu, Y. Han, A. V. Malko, X. G. Liu, H. G. Yang, O. M. Bakr, H. Liu, O. F. Mohammed, *ACS Nano*. 2019, **13**, 2520-2525.
- [11] X. Zhao, G. Niu, J. Zhu, B. Yang, J. H. Yuan, S. Li, W. Gao, Q. Hu, L. Yin, K. H. Xue, *J. Phys. Chem. Lett.* 2020, **11**, 1873-1880.
